# Supplementary material for: Synthesis of (2S,3R)-[3′,3′,3′-2H3]-valine and (2S,3S)-4-fluorovaline
Source: Royal Society of Chemistry journal article supplement (doi:10.1039/b401646g), 2004-01-01
Supplement: b401646g.pdf [file b401646g.pdf]

Current Data Parameters  
 NAME jec3H  
 EXPNO 10  
 PROCNO 1

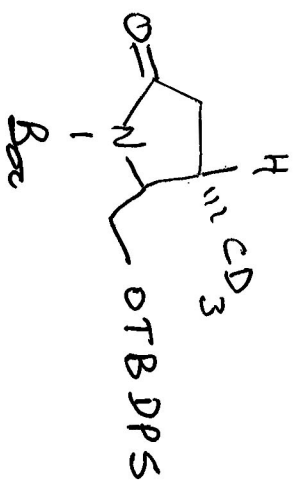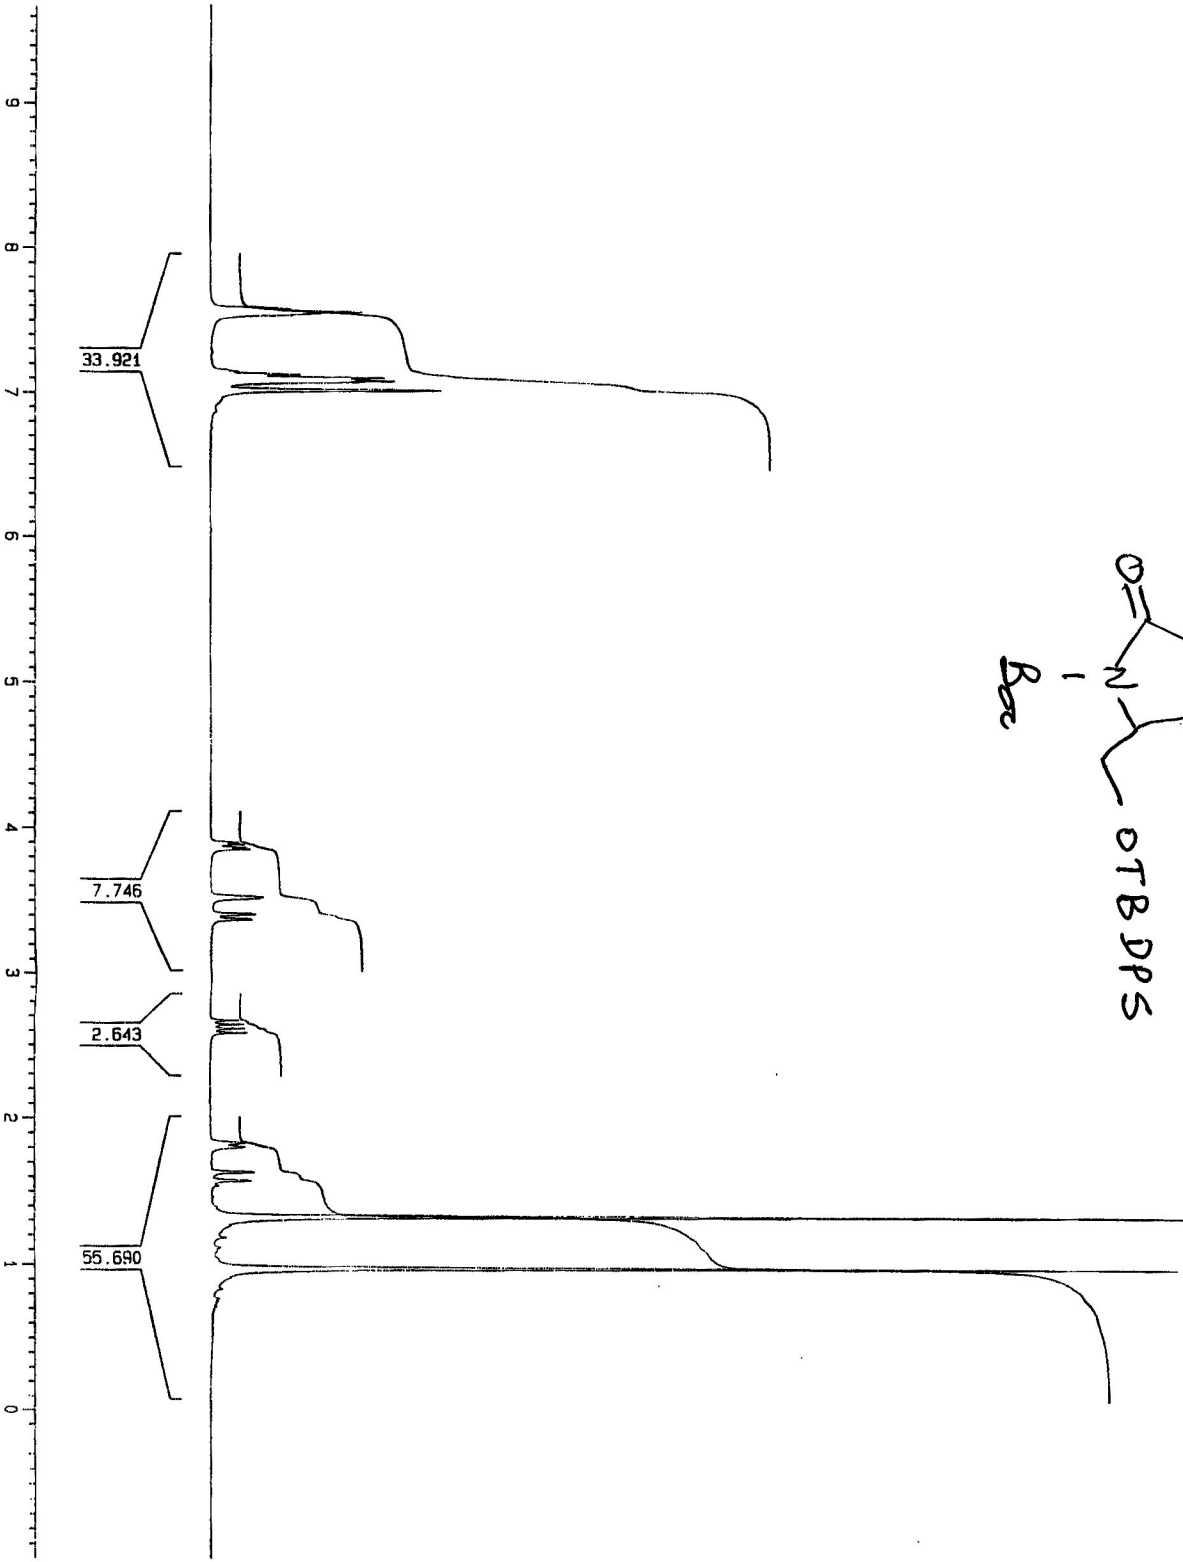

F2 - Acquisition Parameters

Date\_ 971128  
 Time 17.07  
 INSTRUM dpx300  
 PROBH0 5 mm Dual 13  
 PULPROG zg30  
 TD 32768  
 SOLVENT C6D6  
 NS 16  
 DS 2  
 SWH 6172.839 Hz  
 FIDRES 0.188360 Hz  
 AQ 2.6542560 sec  
 RG 181  
 DW 81.000 usec  
 DE 5.50 usec  
 TE 300.0 K  
 D1 1.00000000 sec  
 P1 10.50 usec  
 DE 5.50 usec  
 SF01 300.1318534 MHz  
 NUC1 1H  
 PL1 -6.00 dB

F2 - Processing parameters

SI 16384  
 SF 300.1300729 MHz  
 MDW EM  
 SSB 0  
 LB 0.30 Hz  
 GB 0  
 PC 1.00

1D NMR plot parameters

CX 30.00 cm  
 F1P 11.000 ppm  
 F1 3301.43 Hz  
 F2P -1.000 ppm  
 F2 -300.13 Hz  
 PPMCM 0.40000 ppm/cm  
 HZCM 120.05202 Hz/cm

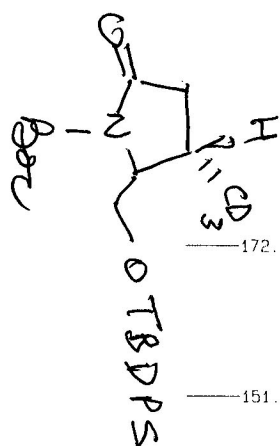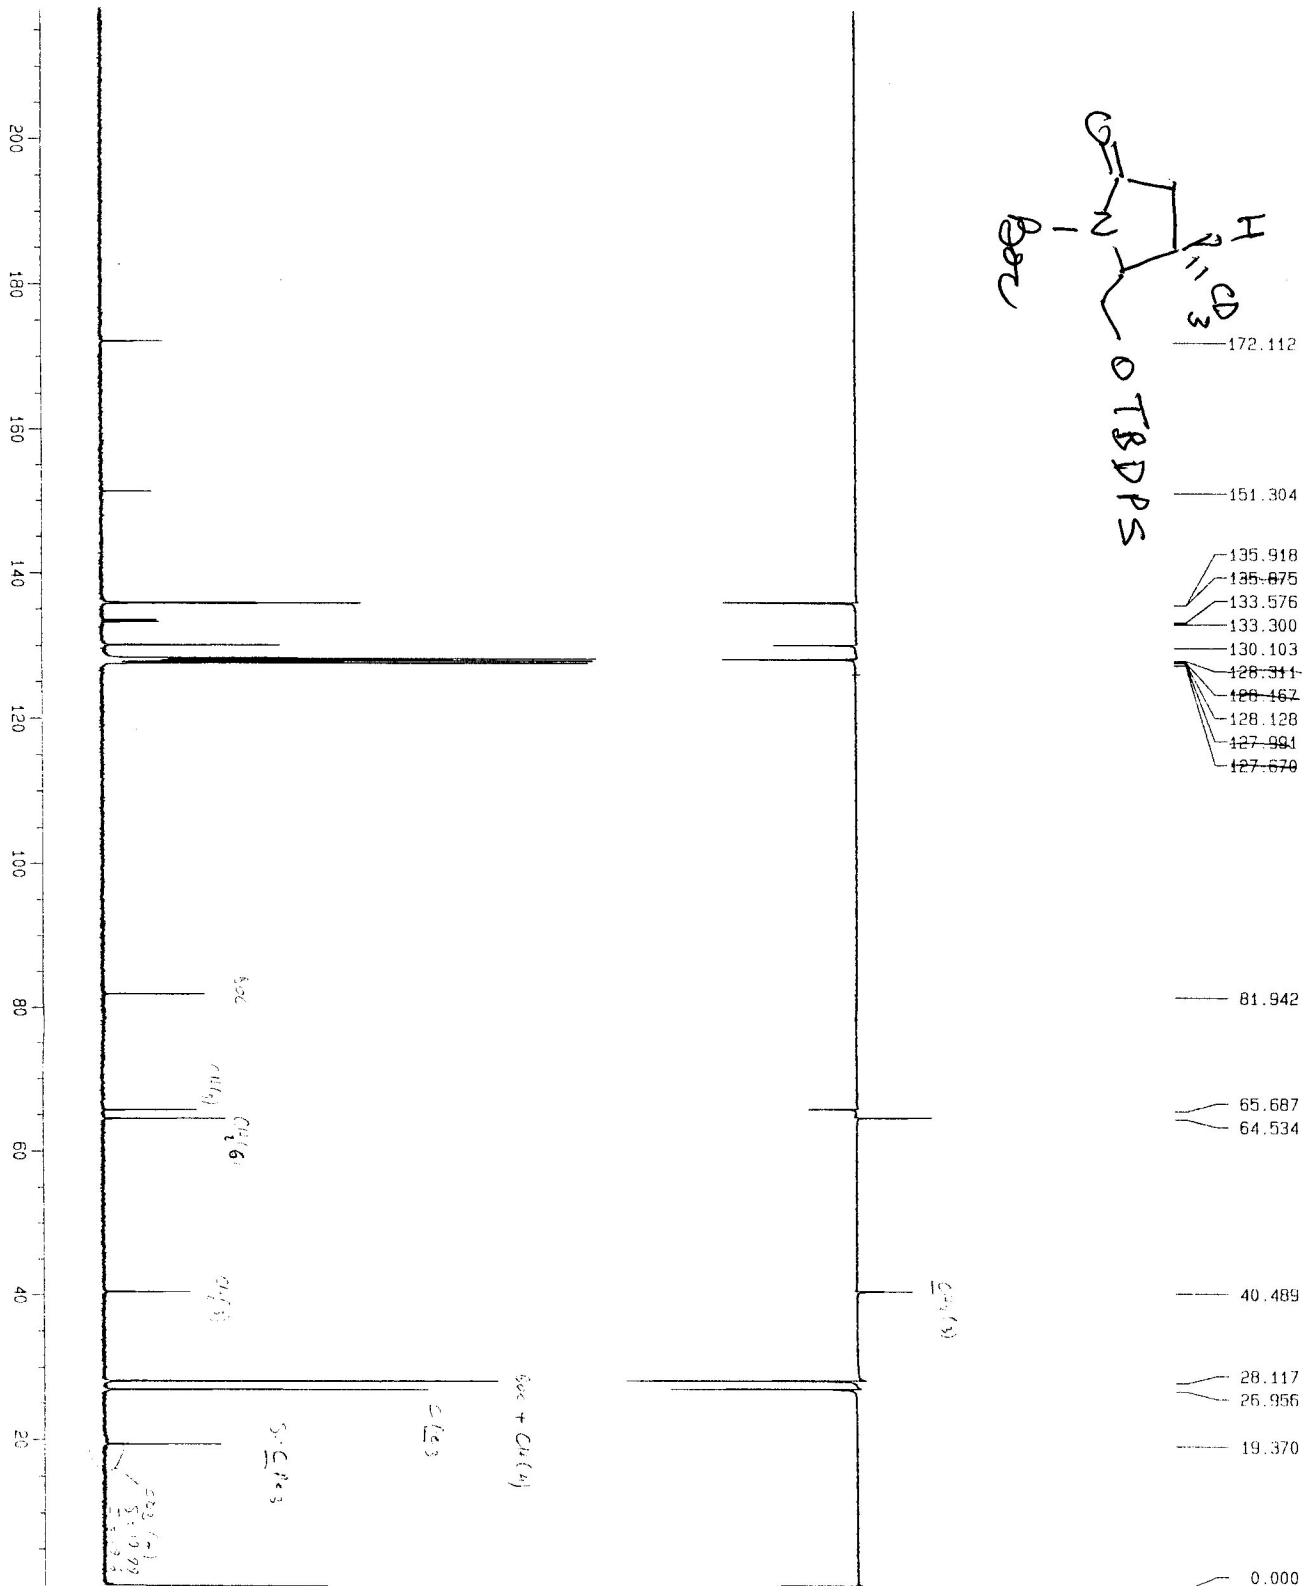

Current Data Parameters  
 NAME jecd3c3  
 EXPNO 11  
 PROCNO 1

F2 - Acquisition Parameters

Date\_ 971202  
 Time 22.02  
 INSTRUM dpx300  
 PROBHD 5 mm Dual 13  
 PULPROG zgpg30  
 TD 65536  
 SOLVENT CDCl3  
 NS 256  
 DS 2  
 SMH 23809.523 Hz  
 FIDRES 0.363304 Hz  
 AQ 1.3763051 sec  
 RG 1024  
 DM 21.000 usec  
 DE 5.50 usec  
 TE 300.0 K  
 D12 0.0002000 sec  
 PL13 18.00 dB  
 D1 1.00000000 sec  
 CPDPRG2 waltz16  
 PCPD2 100.00 usec  
 SF02 300.1312005 MHz  
 NUC2 1H  
 PL2 -6.00 dB  
 PL12 16.00 dB  
 P1 6.00 usec  
 DE 5.50 usec  
 SF01 75.4772501 MHz  
 NUC1 13C  
 PL1 -3.00 dB  
 D11 0.03000000 sec

F2 - Processing Parameters

SI 32768  
 SF 75.4677330 MHz  
 WDM EM  
 SSB 0  
 LB 1.00 Hz  
 GB 0  
 PC 1.40

1D NMR plot parameters

CX 30.00 cm  
 F1P 240.000 ppm  
 F1 18112.26 Hz  
 F2P 0.000 ppm  
 F2 0.00 Hz  
 PPMCM 8.00000 ppm/cm  
 HZCM 503.74182 Hz/cm

CD3 ring opening

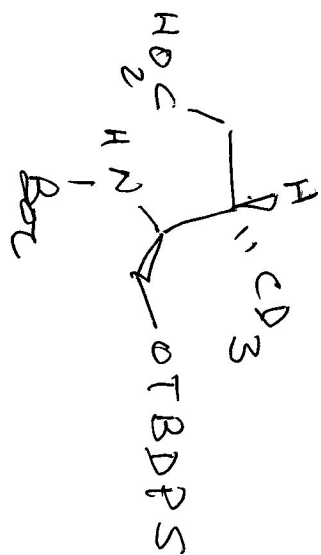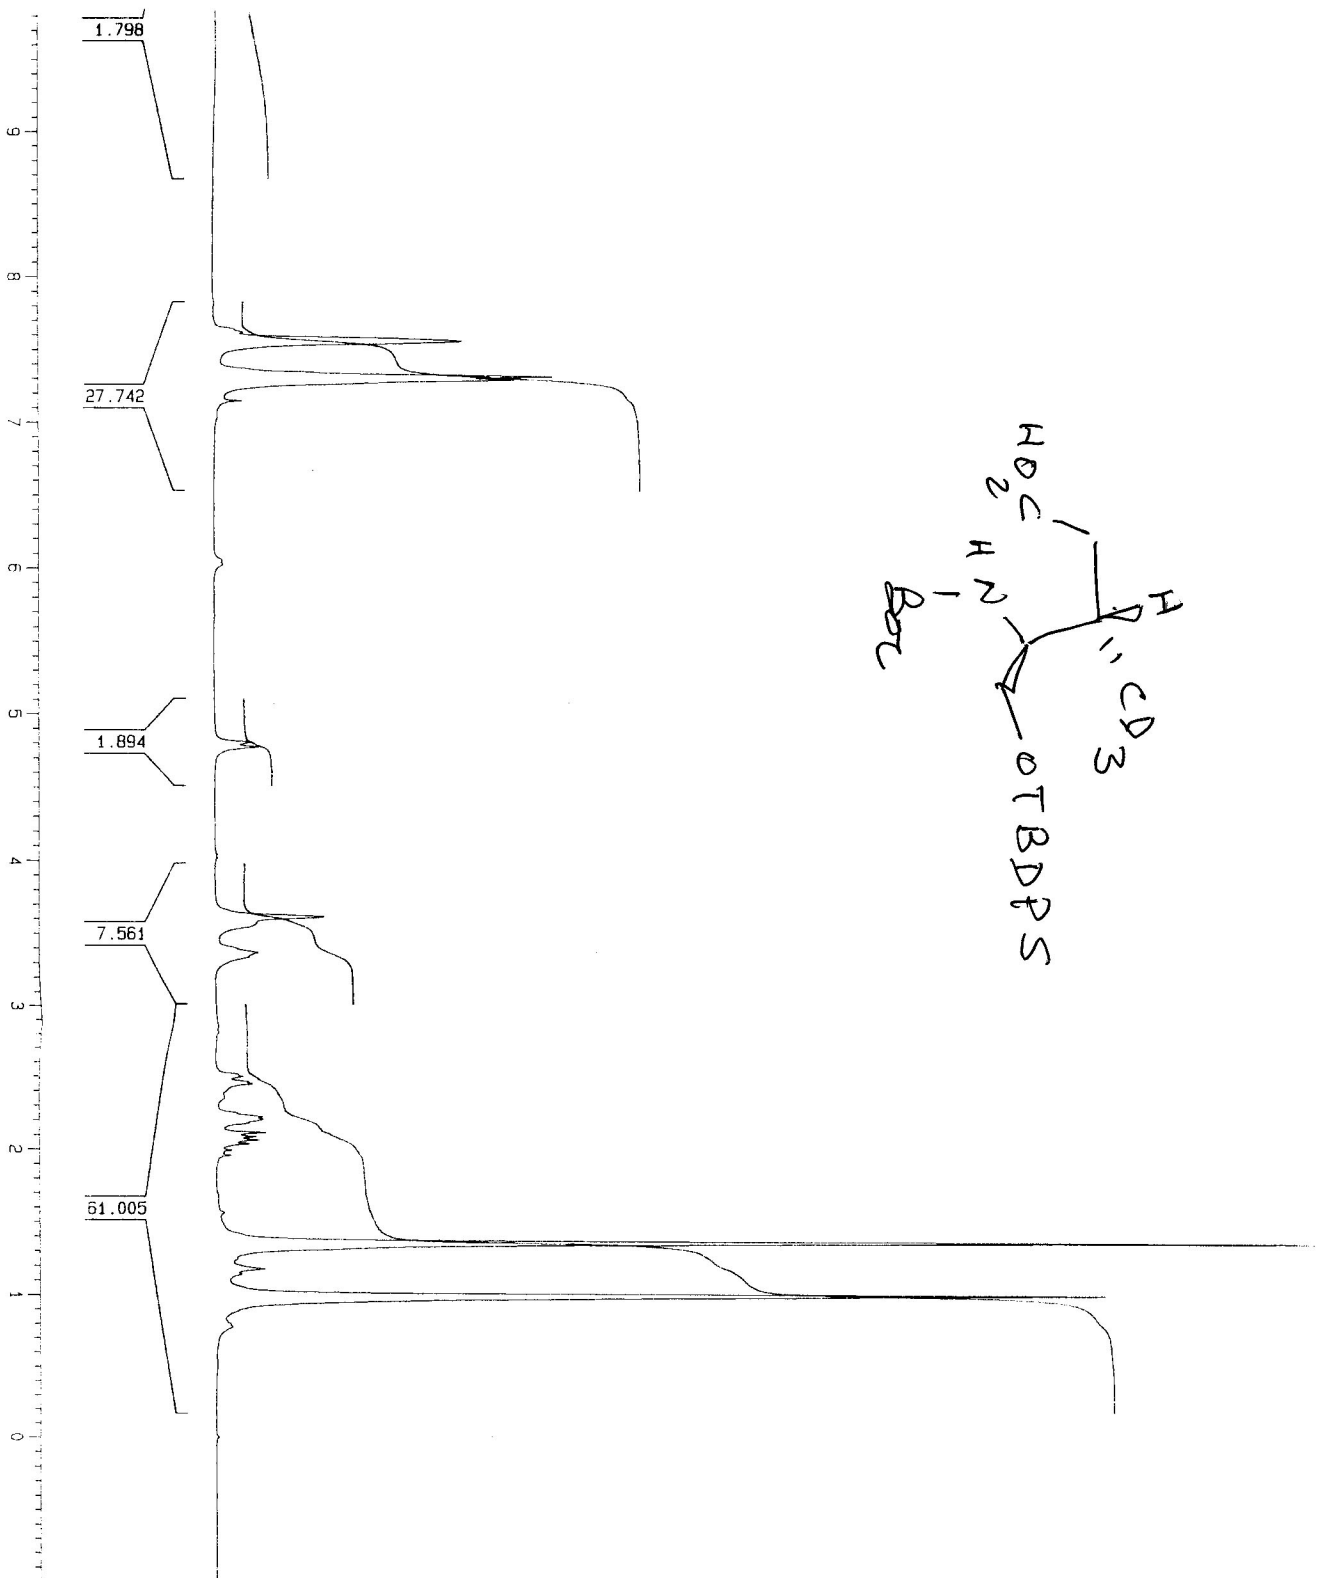

Current Data Parameters  
 Name jeacid  
 ExpNo 21  
 ProcNo 1

F2 - Acquisition Parameters  
 Date\_ 9/12/19  
 Time 9.39

INSTRUM dpx300  
 PROBHD 5 mm Dual 13  
 PULPROG zg30  
 TD 32768  
 SOLVENT CDCl3  
 NS 16  
 DS 2

SWH 6172.839 Hz  
 FIDRES 0.188380 Hz  
 AQ 2.6542580 sec  
 RG 64

DW 81.000 usec  
 DE 5.50 usec  
 TE 300.0 K  
 O1 1.00000000 sec

P1 10.50 usec  
 DE 5.50 usec  
 SFO1 300.1318534 MHz  
 NUC1 1H  
 PL1 -6.00 dB

F2 - Processing parameters

SI 16384  
 SF 300.1300478 MHz  
 MDW EM  
 SSB 0  
 LB 0.30 Hz  
 GB 0  
 PC 1.00

1D NMR plot parameters

CX 30.00 cm  
 F1P 11.000 ppm  
 F1 3301.43 Hz  
 F2P -1.000 ppm  
 F2 -300.13 Hz  
 PPMCM 0.40000 ppm/cm  
 HZCM 120.05202 Hz/cm

CD3 ring opening

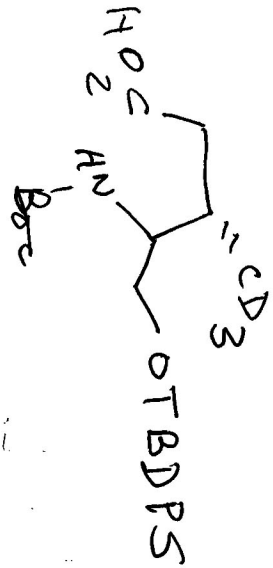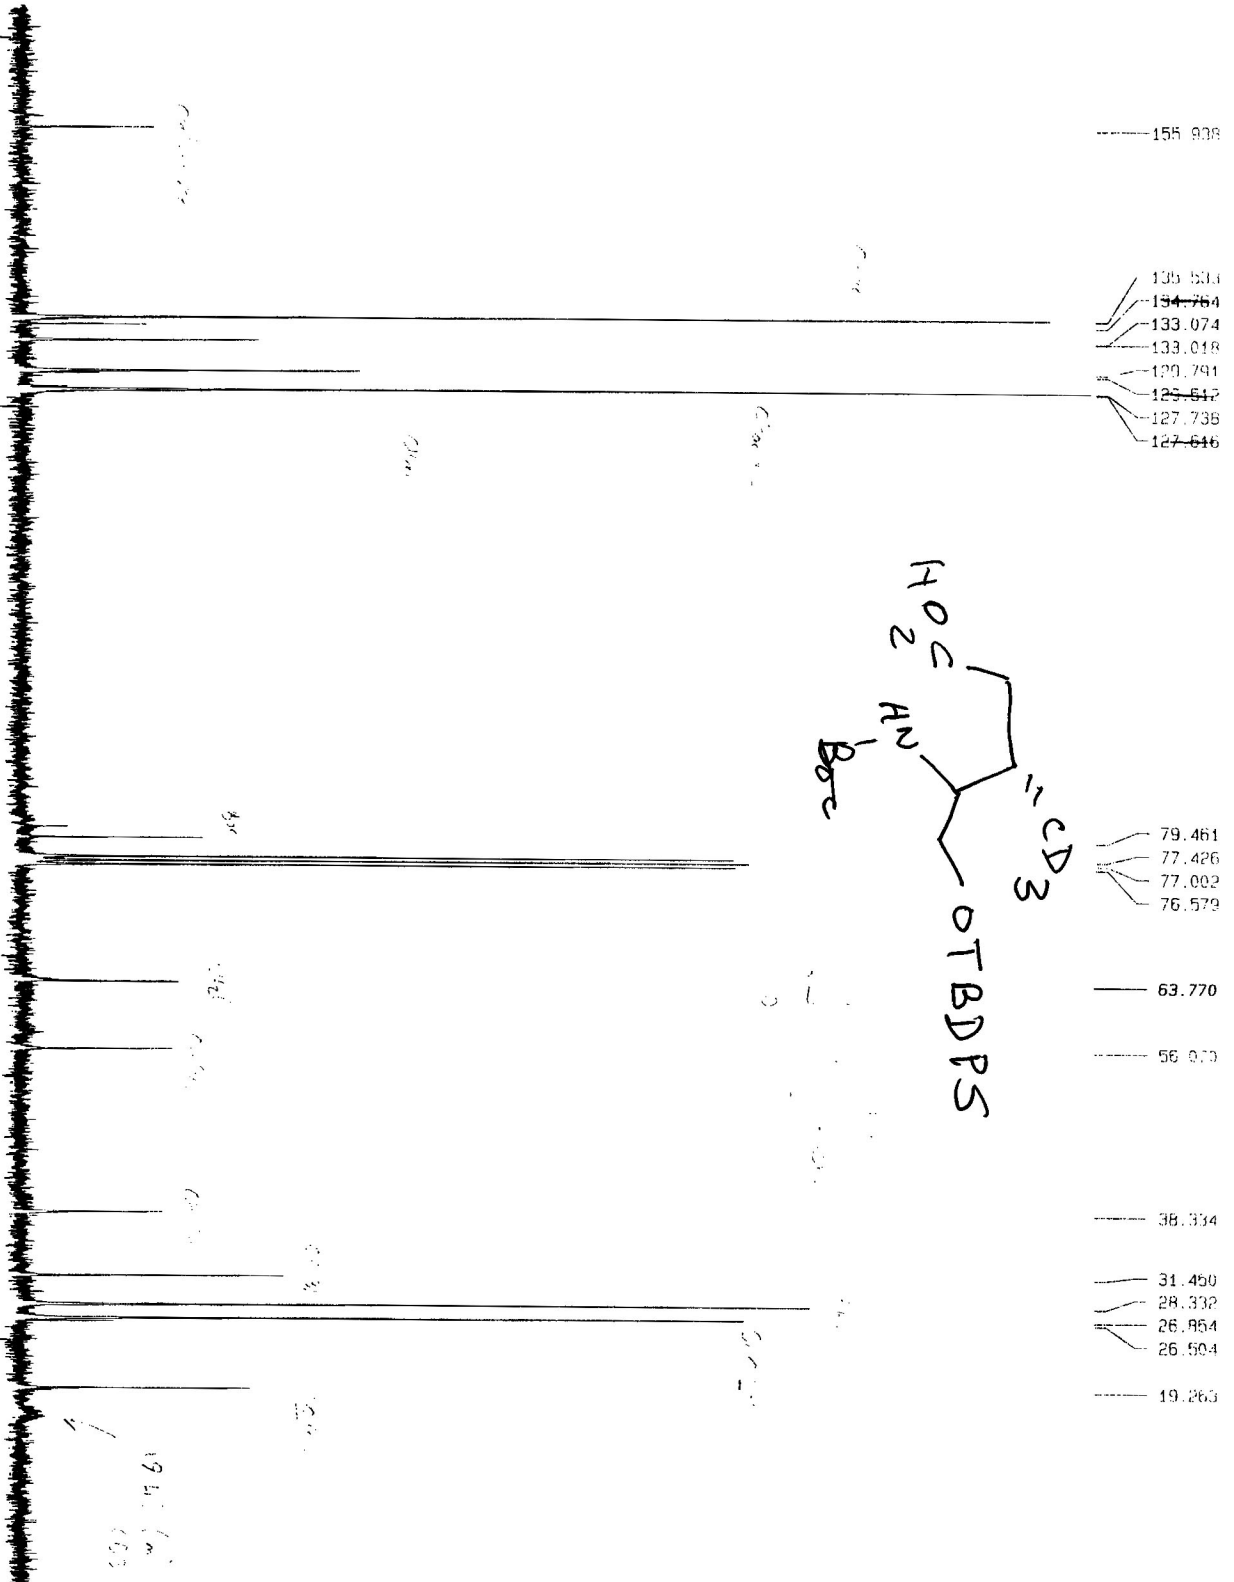

Current Data Parameters  
 NAME jeacid  
 EXPNO 22  
 PROCNO 1

F2 - Acquisition Parameters  
 Date\_ 971219  
 Time 9.59

INSTRUM dpx300  
 PROBHD 5 mm Dual 13  
 PULPROG zgpg30  
 TD 65536  
 SOLVENT C0C13  
 NS 256  
 DS 2

SWH 23809.523 HZ  
 FIDRES 0.363304 HZ  
 AQ 1.3763061 sec  
 RG 2048

DW 21.000 usec  
 DE 5.50 usec  
 TE 300.0 K

D12 0.00002000 sec  
 PL13 18.00 dB  
 J1 3.00000000 sec

CPDPRG2 wait1216  
 PCPD2 100.00 usec  
 SFO2 300.1312005 MHz

NUC2 1H  
 PL2 -6.00 dB  
 PL12 16.00 dB

P1 6.00 usec  
 DE 5.50 usec  
 SFO1 75.4772501 MHz

NUC1 13C  
 PL1 -3.00 dB  
 D11 0.03000000 sec

F2 - Processing parameters  
 SI 32768  
 SF 75.4677566 MHz

MDW EM  
 SSB 0  
 LB 1.00 HZ

GB 0  
 PC 1.40

1D NMR plot parameters  
 CX 30.00 cm  
 F1P 185.640 DDM

F1 14009.85 HZ  
 F2P -1.998 ppm  
 F2 -150.77 HZ

PRICHM 6.25460 ppm/cm  
 FFCM 472.02957 HZ/cm

7  
6  
5  
4  
3  
2  
1  
0

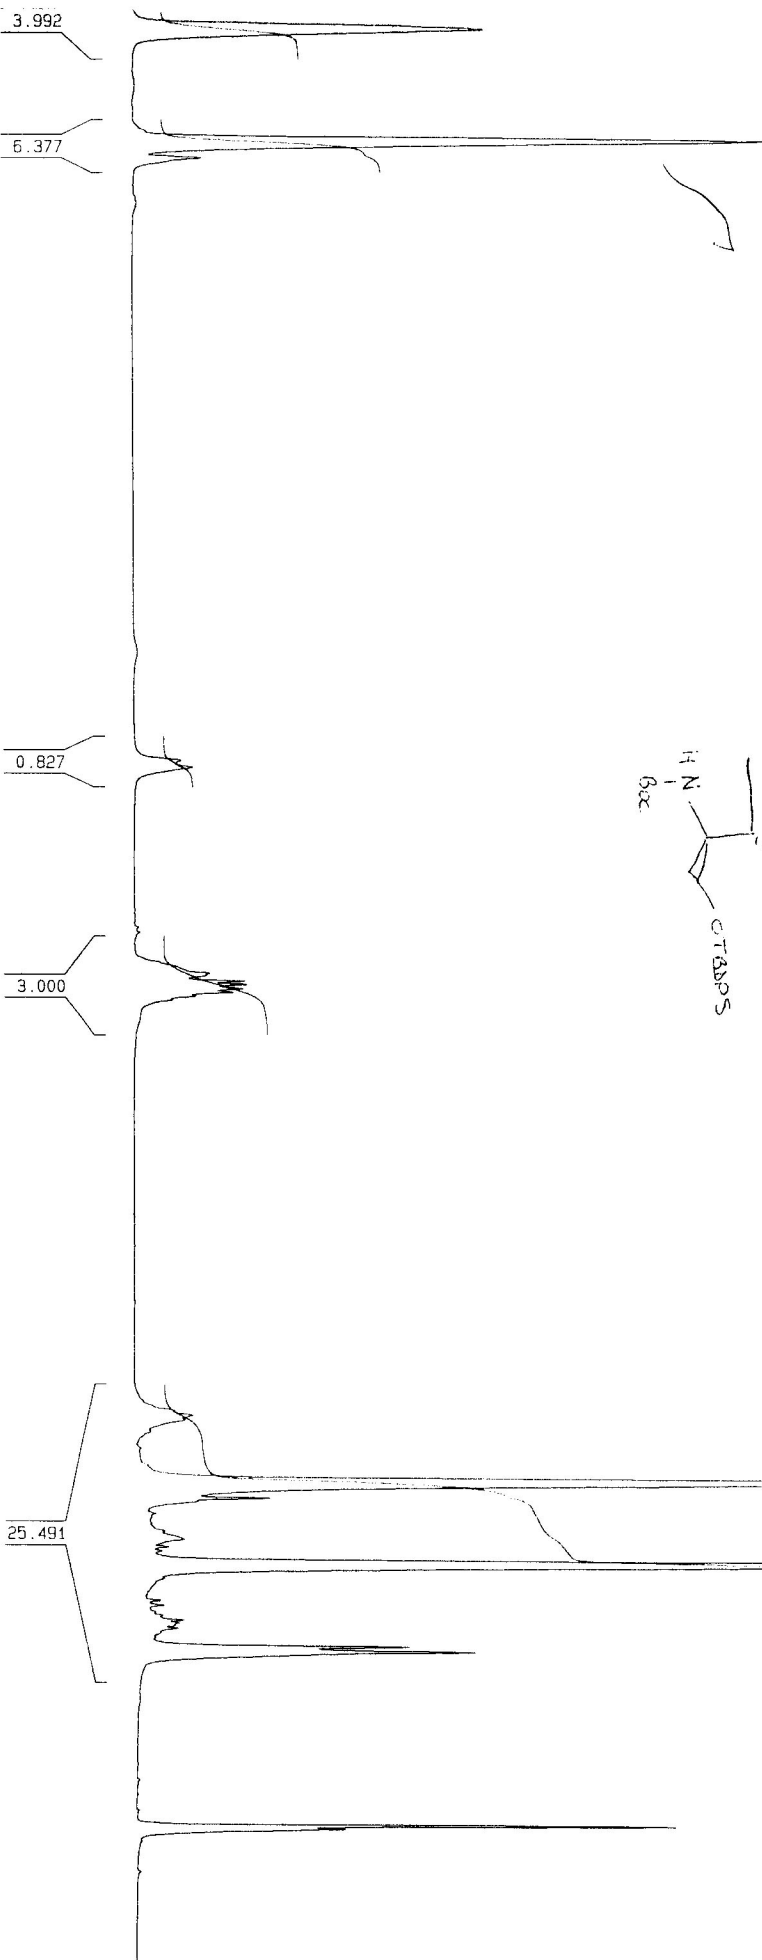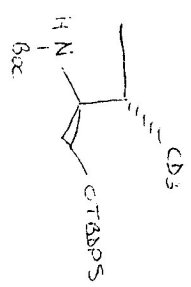

- 7.7156
- 7.4790
- 7.2343
- 7.1654
- 6.9736

5.0382

4.5622  
4.5331 } NH ; 4.55

3.6495  
3.6164  
3.6018  
3.5836  
3.5678  
3.5507 } CH(2)  
? 5

1.7522  
1.7327  
1.6106  
1.4768 } CH(3)  
1.4443  
1.3269  
1.2736  
1.2277  
1.1444 } Boc

1.1706 } Si-C(CH3)3

0.9680  
0.9476  
0.9318  
0.9045  
0.8840  
0.8743  
0.8628  
0.8493  
0.7713  
0.7493 } CH3, δ = 0.1

0.4367  
0.4055  
0.4004  
0.4139  
0.0666  
0.1976

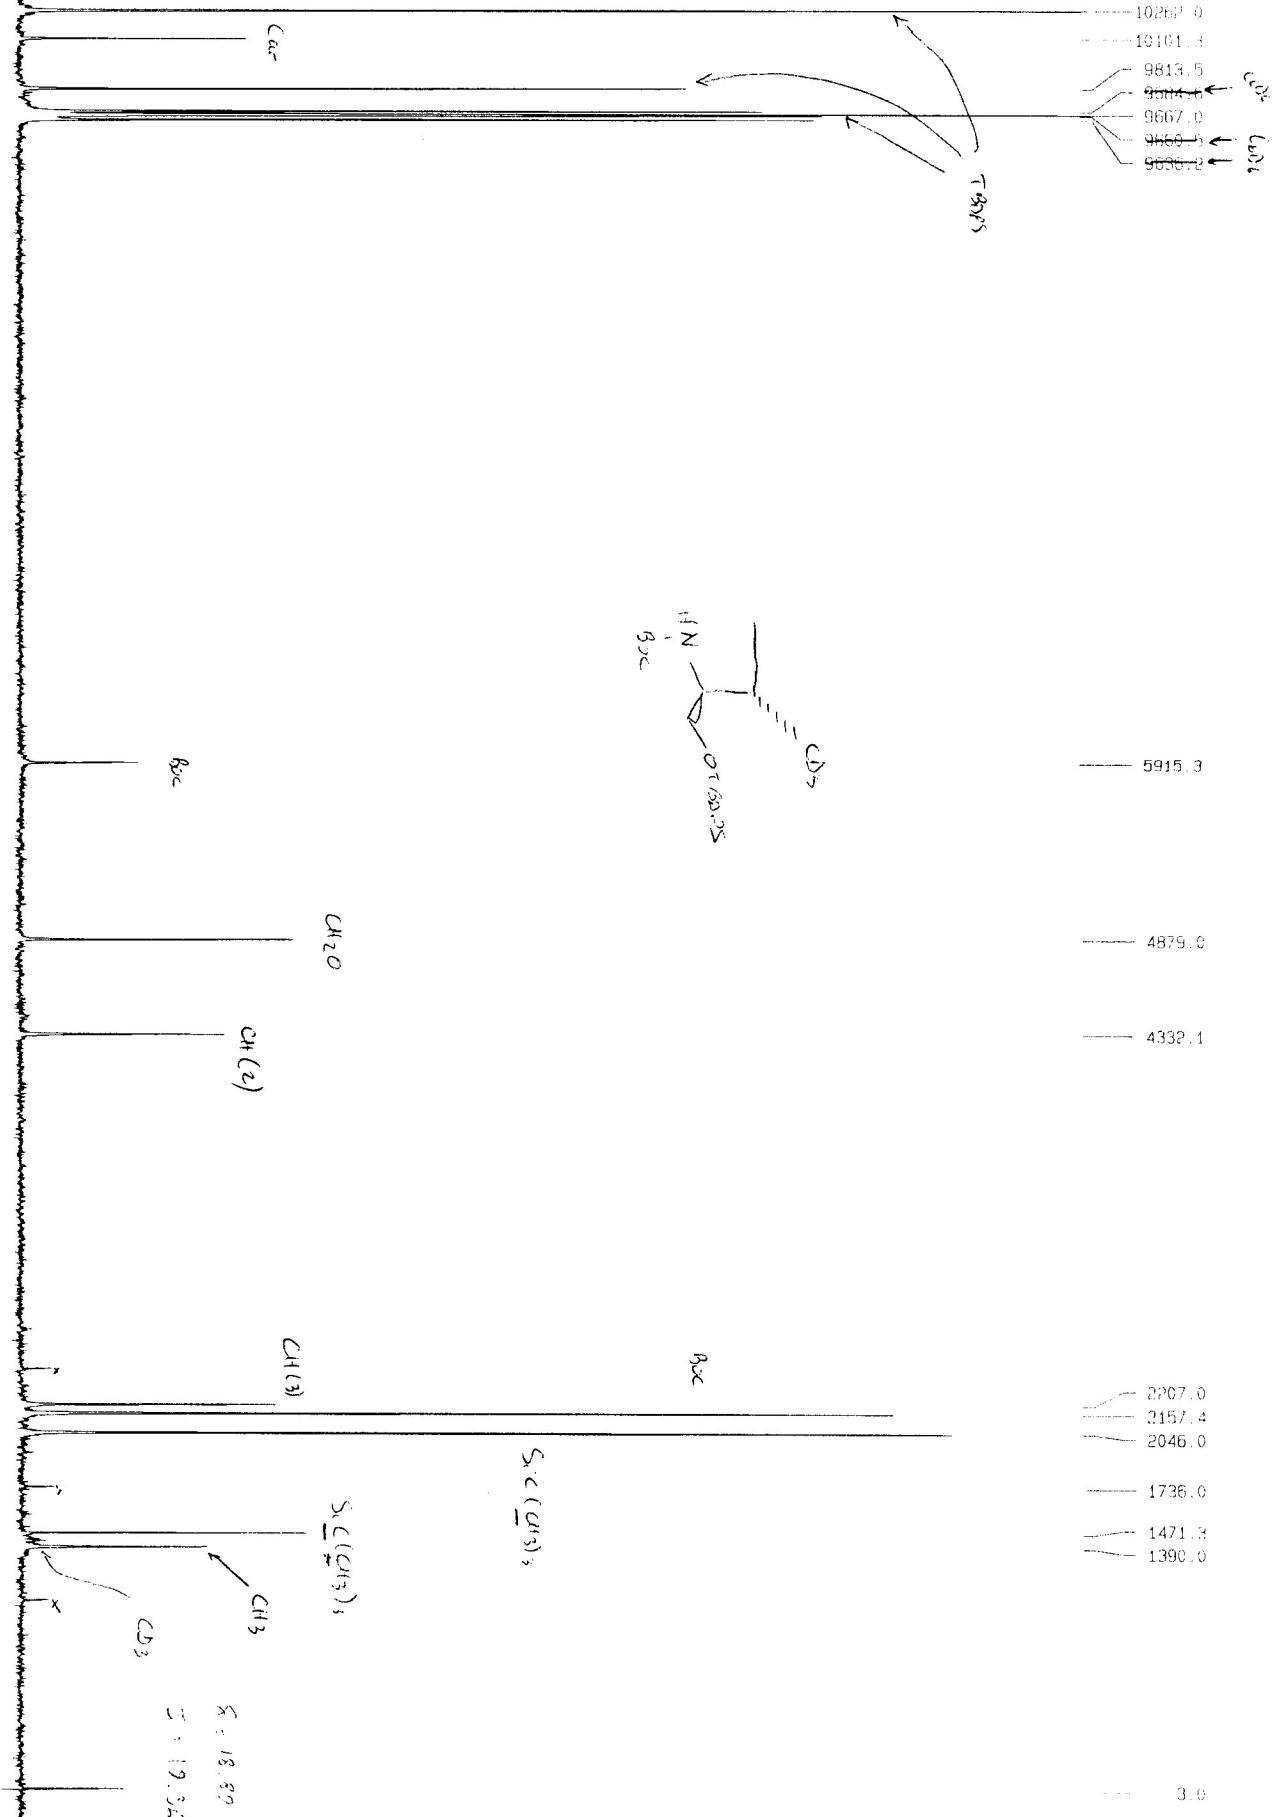

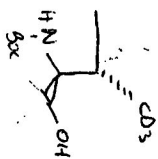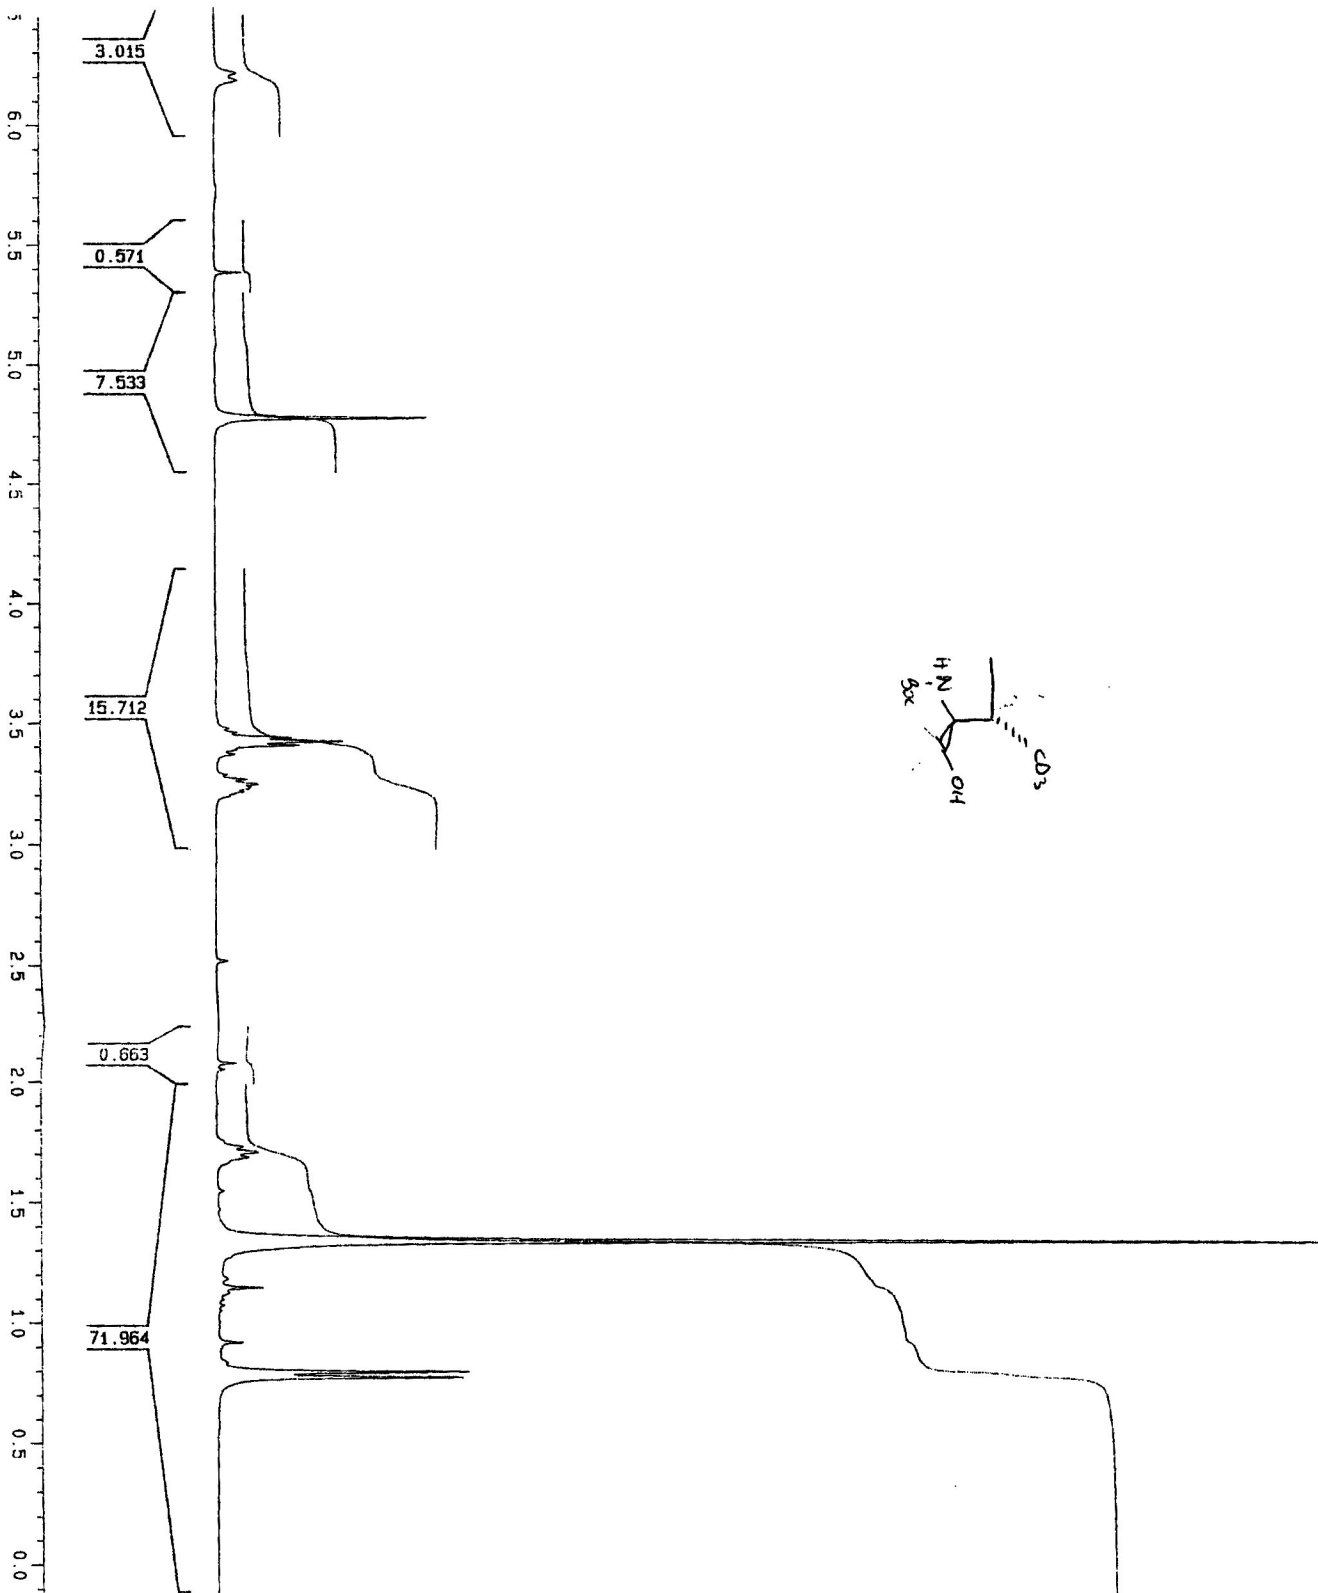

Current Data Parameters  
 NAME jecd3DH2  
 EXPNO 10  
 PROCNO 1

F2 - Acquisition Parameters

Date\_ 980304  
 Time 9.34  
 INSTRUM dpx300  
 PROBHD 5 mm Dual 13  
 PULPROG zg30  
 TD 32768  
 SOLVENT MeOH  
 NS 16  
 DS 2  
 SMH 6172.839 Hz  
 FIDRES 0.188360 Hz  
 AQ 2.6542580 sec  
 RG 35.9  
 DK 81.000 usec  
 DE 5.50 usec  
 TE 300.0 K  
 D1 1.00000000 sec  
 P1 10.50 usec  
 DE 5.50 usec  
 SF01 300.1318534 MHz  
 NUC1 1H  
 PL1 -5.00 dB

F2 - Processing parameters

SI 16384  
 SF 300.1300360 MHz  
 MDW EM  
 SSB 0  
 LB 0.30 Hz  
 GB 0  
 PC 1.00

1D NMR plot parameters

CX 30.00 cm  
 F1P 7.146 ppm  
 F1 2144.64 Hz  
 F2P -0.113 ppm  
 F2 -33.79 Hz  
 PPMCH 0.24194 ppm/cm  
 HZCH 72.61424 Hz/cm

CD3 silylether deprotection

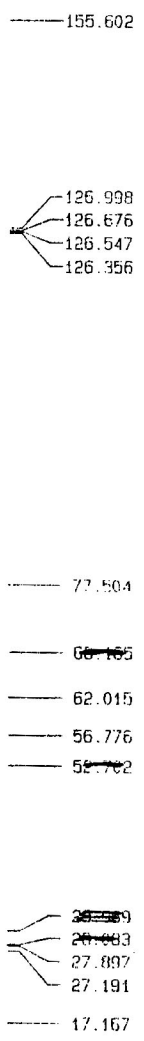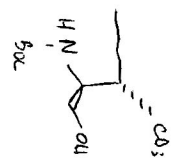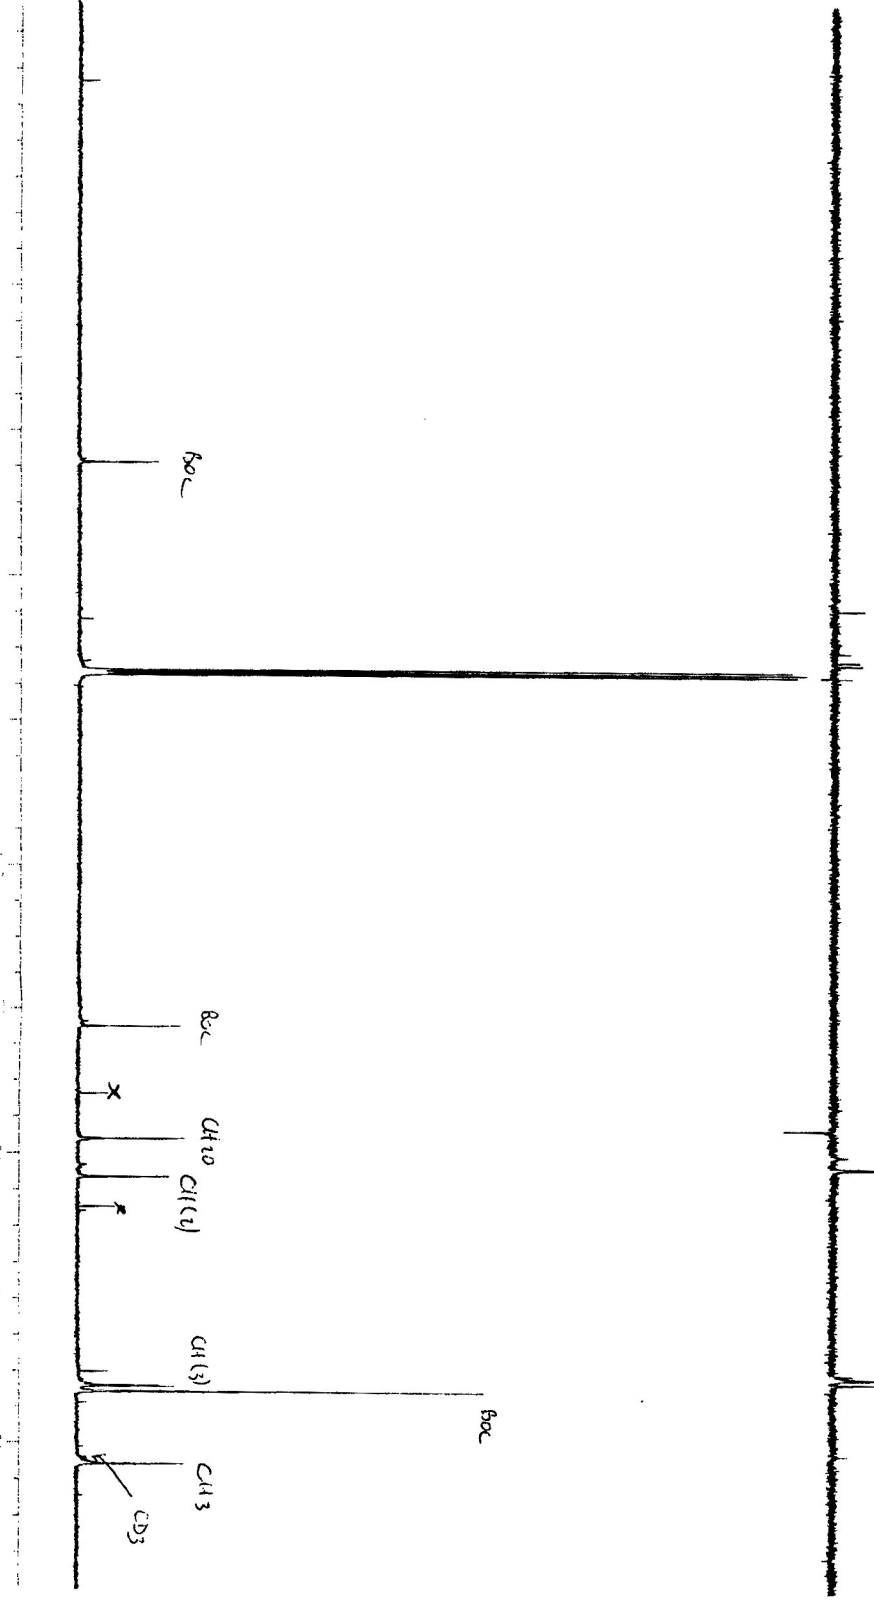

Current Data Parameters  
 NAME J0030H  
 EXPNO 12  
 PROCNO 1

F2 - Acquisition Parameters

Date\_ 980226  
 Time 3.46  
 INSTRUM dpx300  
 PROBD 5 mm Dual 13  
 PULPROG zgpg30  
 TD 65536  
 SOLVENT CDCl3  
 NS 256  
 DS 2  
 SMH 23809.523 HZ  
 FIDRES 0.363304 HZ  
 AQ 1.3763061 sec  
 RG 3649.1  
 DW 21.000 usec  
 DE 5.50 usec  
 TE 300.0 K  
 D12 0.00002000 sec  
 PL13 18.00 dB  
 D1 3.00000000 sec  
 waltz16  
 PCPRG2 100.00 usec  
 SF02 300.1312005 MHz  
 NUC2 1H  
 PL2 -6.00 dB  
 PL12 16.00 dB  
 P1 5.00 usec  
 DE 5.50 usec  
 SF01 75.4772501 MHz  
 NUC1 13C  
 PL1 -3.00 dB  
 D11 0.03000000 sec

F2 - Processing parameters

SI 32768  
 SF 75.4678319 MHz  
 MDW EM  
 SSB 0  
 LB 1.00 Hz  
 GB 0  
 PC 1.40

1D NMR plot parameters

CX 30.00 cm  
 F1P 240.000 ppm  
 F1 18112.28 Hz  
 F2P 0.000 ppm  
 F2 0.00 Hz  
 PPMCM 8.00000 ppm/cm  
 HZCM 603.74261 Hz/cm



Current Data Parameters  
 NAME je-2  
 EXNO 10  
 PROCNO 1

F2 - Acquisition Parameters  
 Date\_ 980305  
 Time 12.21  
 INSTRUM dpx300  
 PROBD 5 mm Dui1 13  
 PULPROG zg30  
 TD 32768  
 SOLVENT MeOH  
 NS 16  
 DS 2

SWH 6172.839 Hz  
 FIDRES 0.169380 Hz  
 AQ 2.8542580 sec  
 RG 90.5  
 DW 81.000 usec  
 DE 5.50 usec  
 TE 300.0 K  
 O1 1.00000000 sec  
 P1 10.50 usec  
 DE 5.50 usec  
 SF01 300.1318534 MHz  
 NUC1 1H  
 PL1 -6.00 dB

F2 - Processing parameters  
 SI 16384  
 SF 300.1300343 MHz  
 WDW EM  
 SSB 0  
 LB 0.30 Hz  
 GB 0  
 PC 1.00

1D NMR plot parameters  
 CX 30.00 cm  
 F1P 11.000 ppm  
 F1 3301.43 Hz  
 F2P -1.000 ppm  
 F2 -300.13 Hz  
 PPMCM 0.40000 ppm/cm  
 HZCM 120.05202 Hz/cm

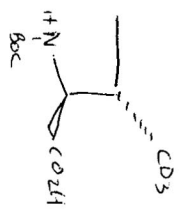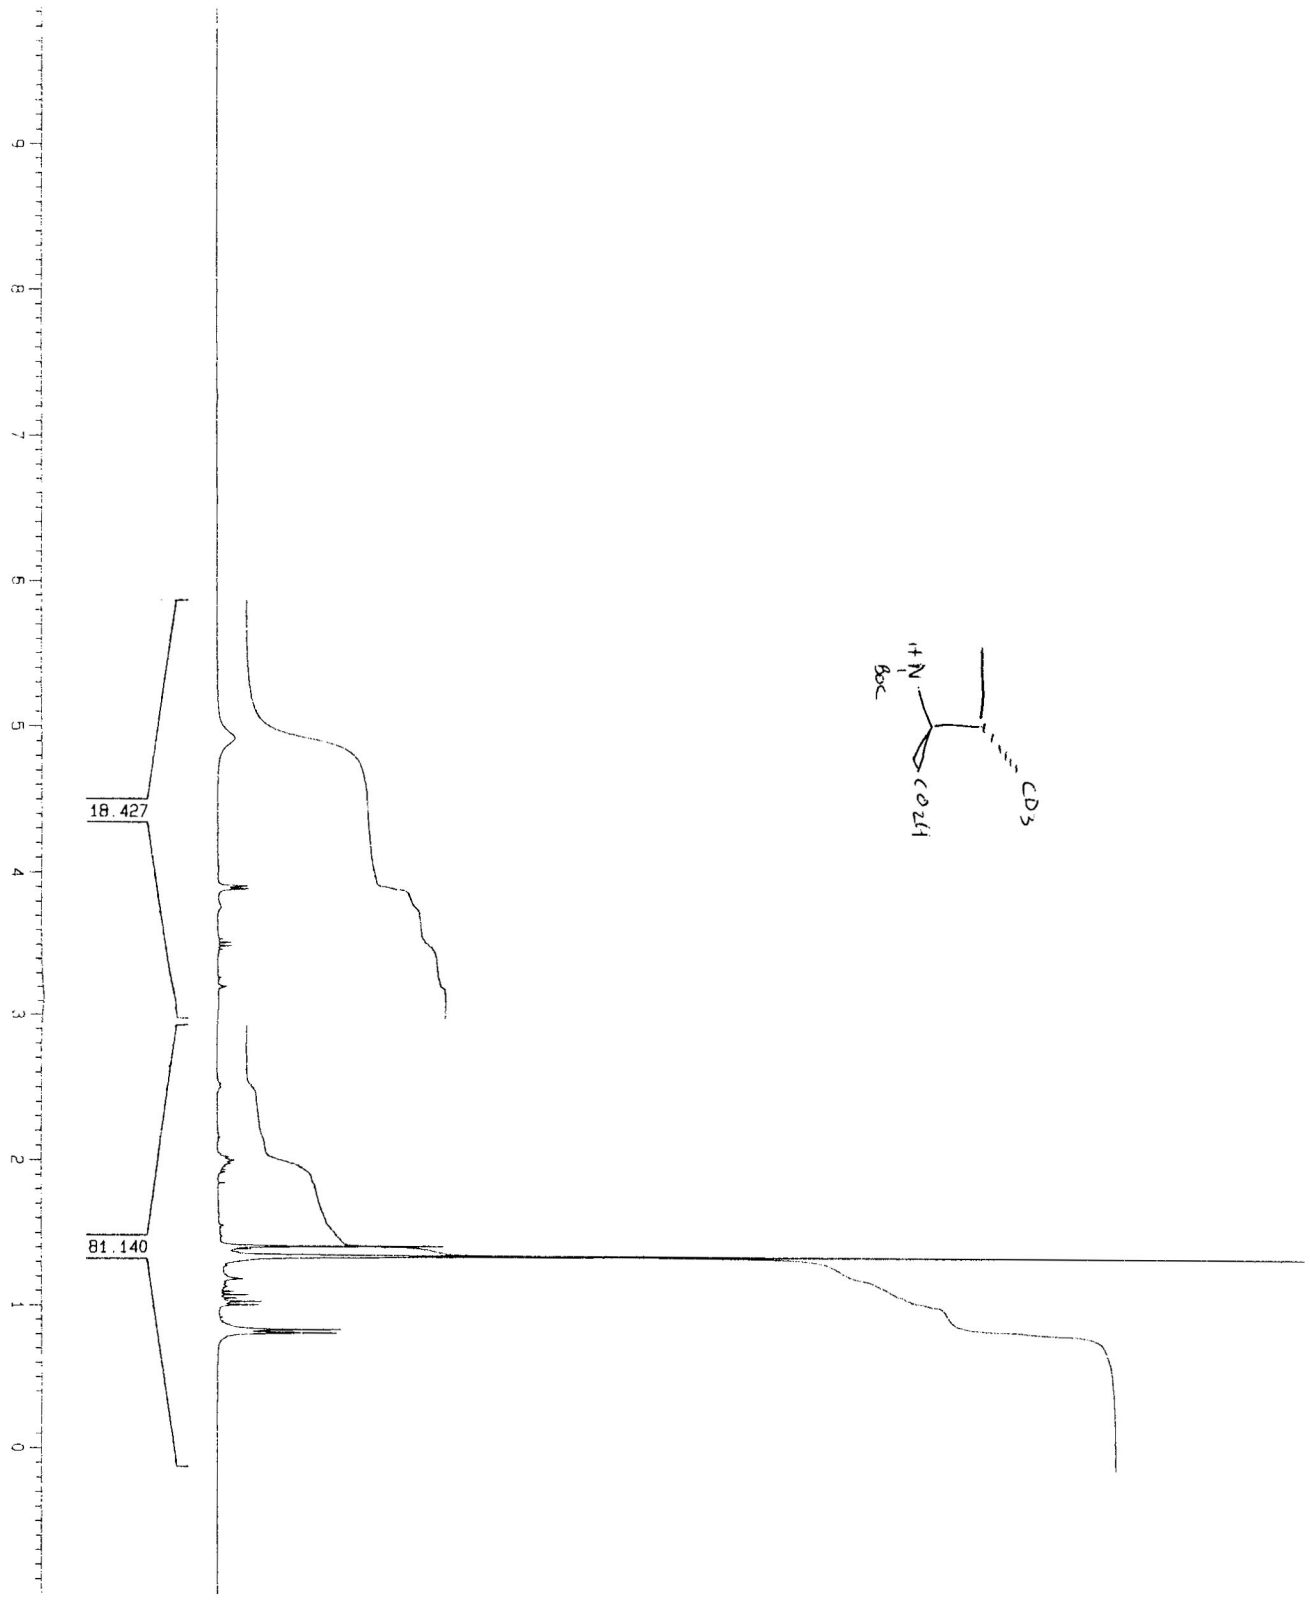

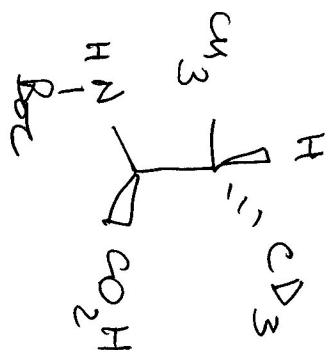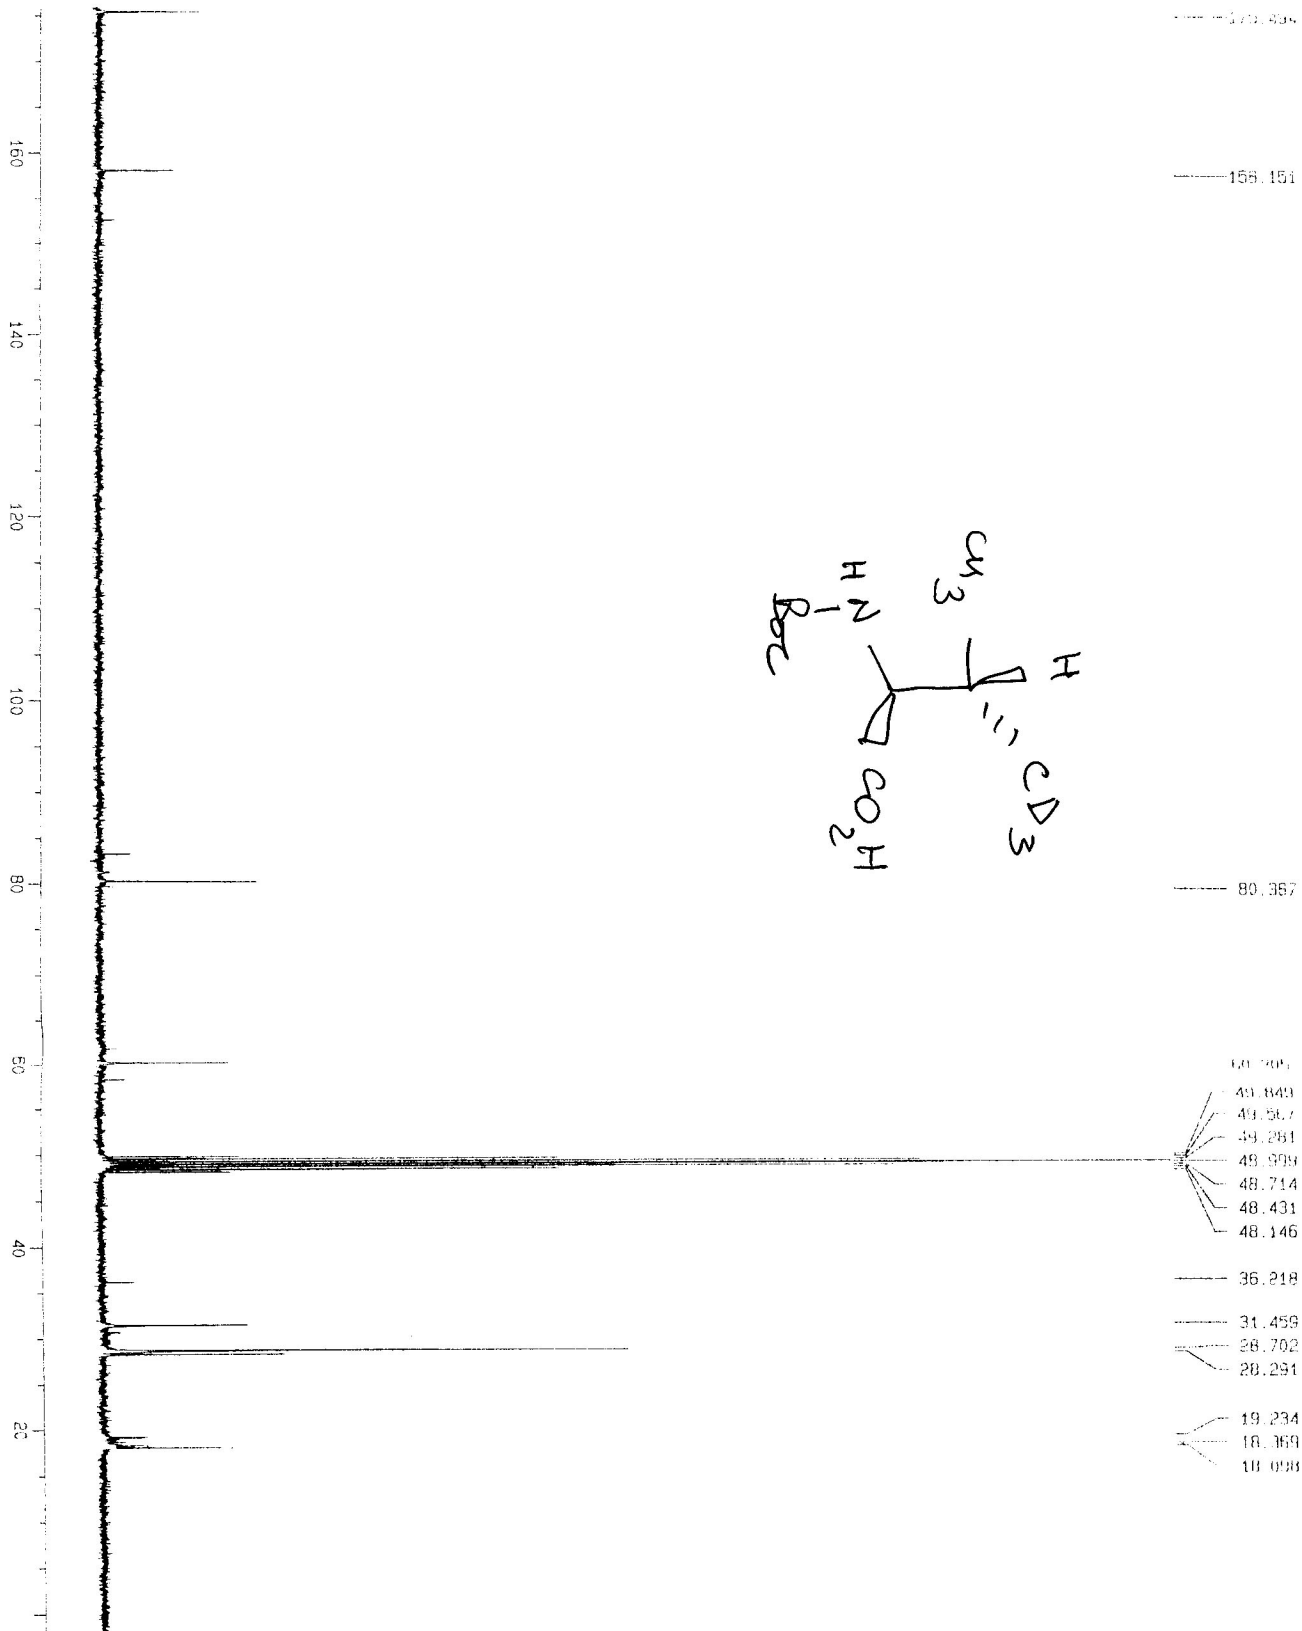

Current Data Parameters  
 NAME j903Val1  
 EXPNO 11  
 PROCNO 1

F2 - Acquisition Parameters  
 Date\_ 980305  
 Time 21.17  
 INSTRUM dpx300  
 PROBRWD 5 mm Dual 13  
 PULPROG zgpg30  
 TD 65536  
 SOLVENT MeOH  
 NS 256  
 DS 2  
 SMH 23809.523 Hz  
 FIDRES 0.363304 Hz  
 AQ 1.3763061 sec  
 RG 1149.4  
 DM 21.000 usec  
 DE 5.50 usec  
 TE 300.0 K  
 D12 0.00002000 sec  
 PL13 18.00 dB  
 D1 3.00000000 sec  
 CPDPRG2 waltz15  
 PCPD2 100.00 usec  
 SF02 300.1312005 MHz  
 NUQ2 1H  
 PL2 -6.00 dB  
 PL12 16.00 dB  
 P1 6.00 usec  
 DE 5.50 usec  
 SF01 75.4772501 MHz  
 NUC1 13C  
 PL1 -3.00 dB  
 D11 0.03000000 sec

F2 - Processing parameters  
 SI 32768  
 SF 75.4576494 MHz  
 WDM EM  
 SSB 0  
 LB 1.00 Hz  
 GB 0  
 PC 1.40

1D NMR plot parameters  
 CX 30.00 cm  
 F1p 189.227 ppm  
 F1 14280.55 Hz  
 F2p -1.998 ppm  
 F2 -150.77 Hz  
 PPMCM 6.37417 ppm/cm  
 HZCM 431.04379 Hz/cm

Current Data Parameters  
 NAME jefbart  
 EXPNO 11  
 PROCNO 1

F2 - Acquisition Parameters

Date\_ 980512  
 Time 17.17  
 INSTRUM dpx300  
 PROBHD 5 mm Dual 13  
 PULPROG zg30  
 TD 32768  
 SOLVENT CDCl3  
 NS 16  
 DS 2  
 SWH 6172.839 Hz  
 FIDRES 0.188380 Hz  
 AQ 2.6542580 sec  
 RG 64  
 DW 81.000 usec  
 DE 5.50 usec  
 TE 300.0 K  
 D1 1.00000000 sec  
 P1 10.50 usec  
 DE 5.50 usec  
 SFO1 300.1318534 MHz  
 NUC1 1H  
 PL1 -6.00 dB

F2 - Processing parameters

SI 16384  
 SF 300.1299851 MHz  
 MDW EM  
 SSB 0  
 LB 0.30 Hz  
 GB 0  
 PC 1.00

1D NMR plot parameters

CX 30.00 cm  
 F1P 11.000 ppm  
 F1 3301.43 Hz  
 F2P -1.000 ppm  
 F2 -300.13 Hz  
 PPMCM 0.40000 ppm/cm  
 HZCM 420.05199 Hz/cm

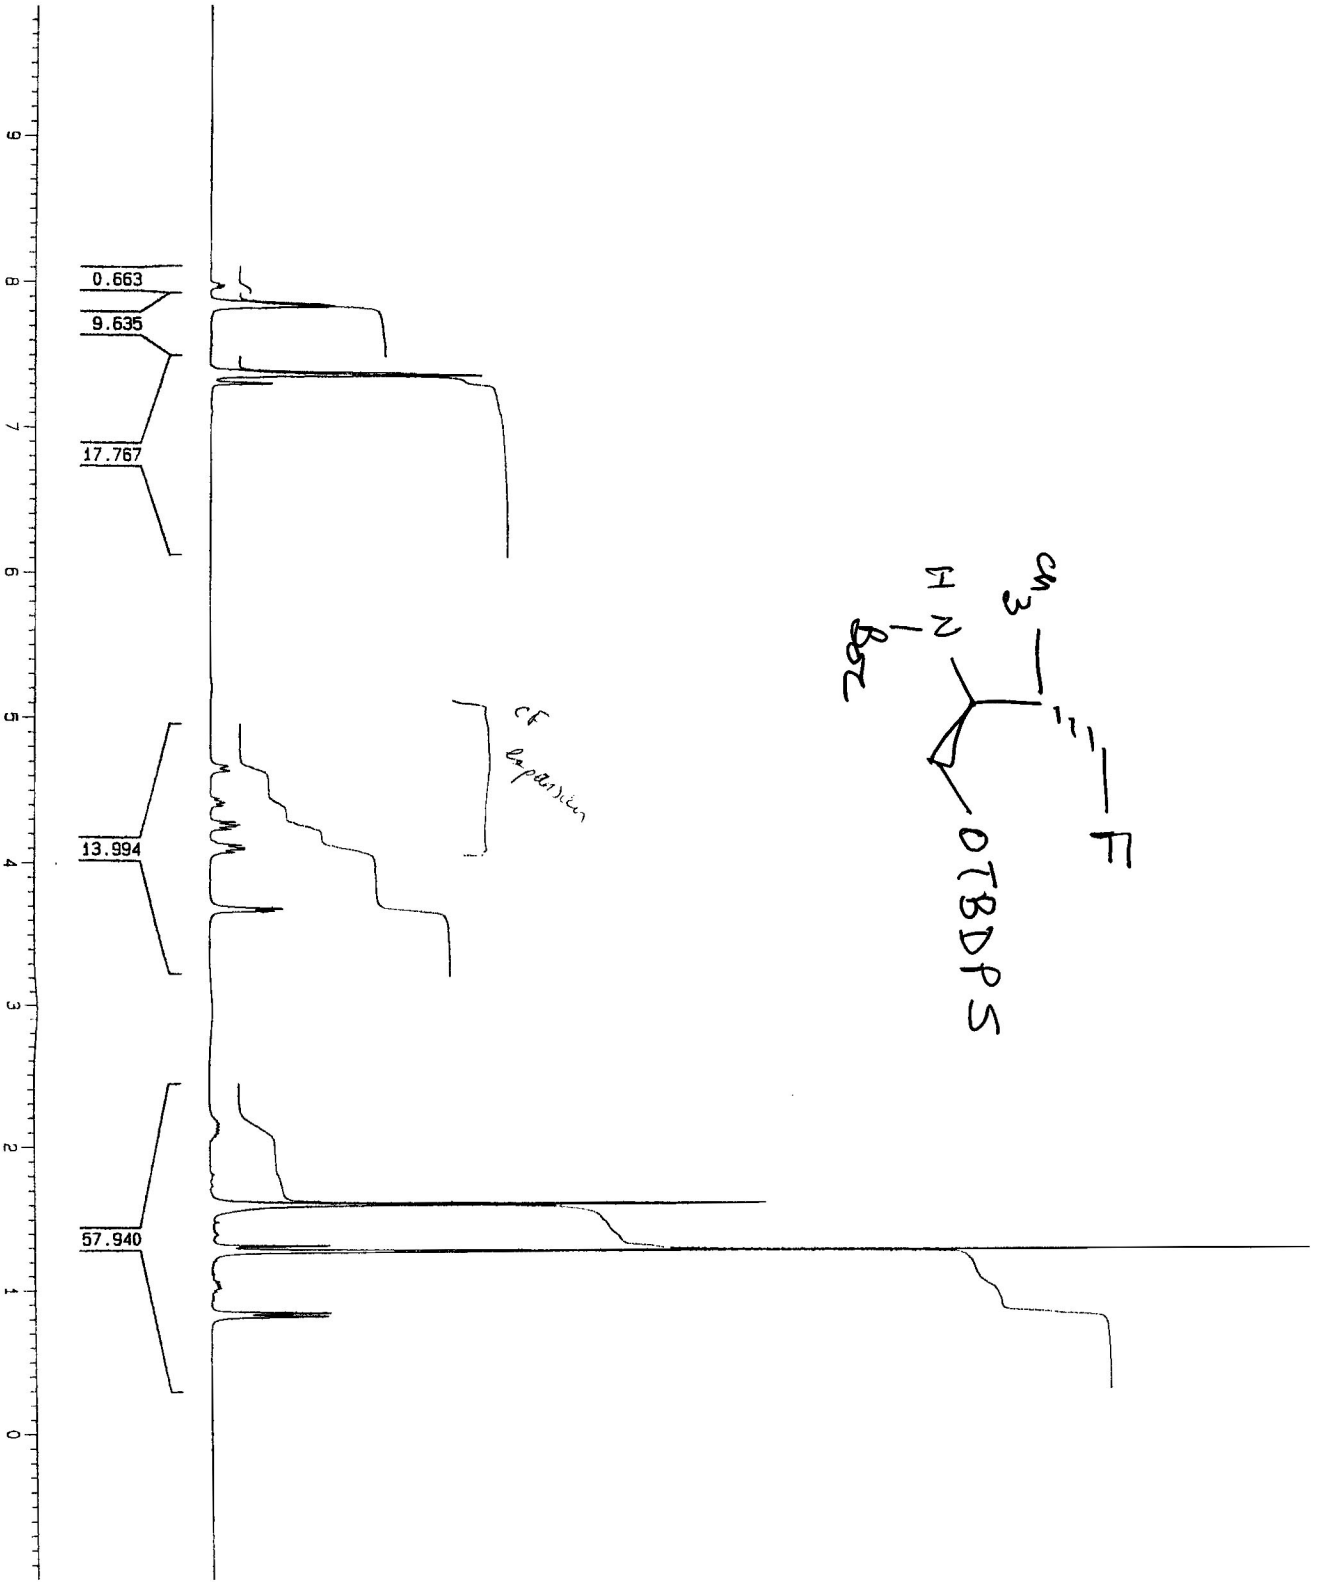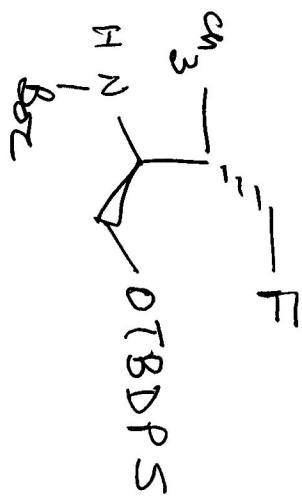

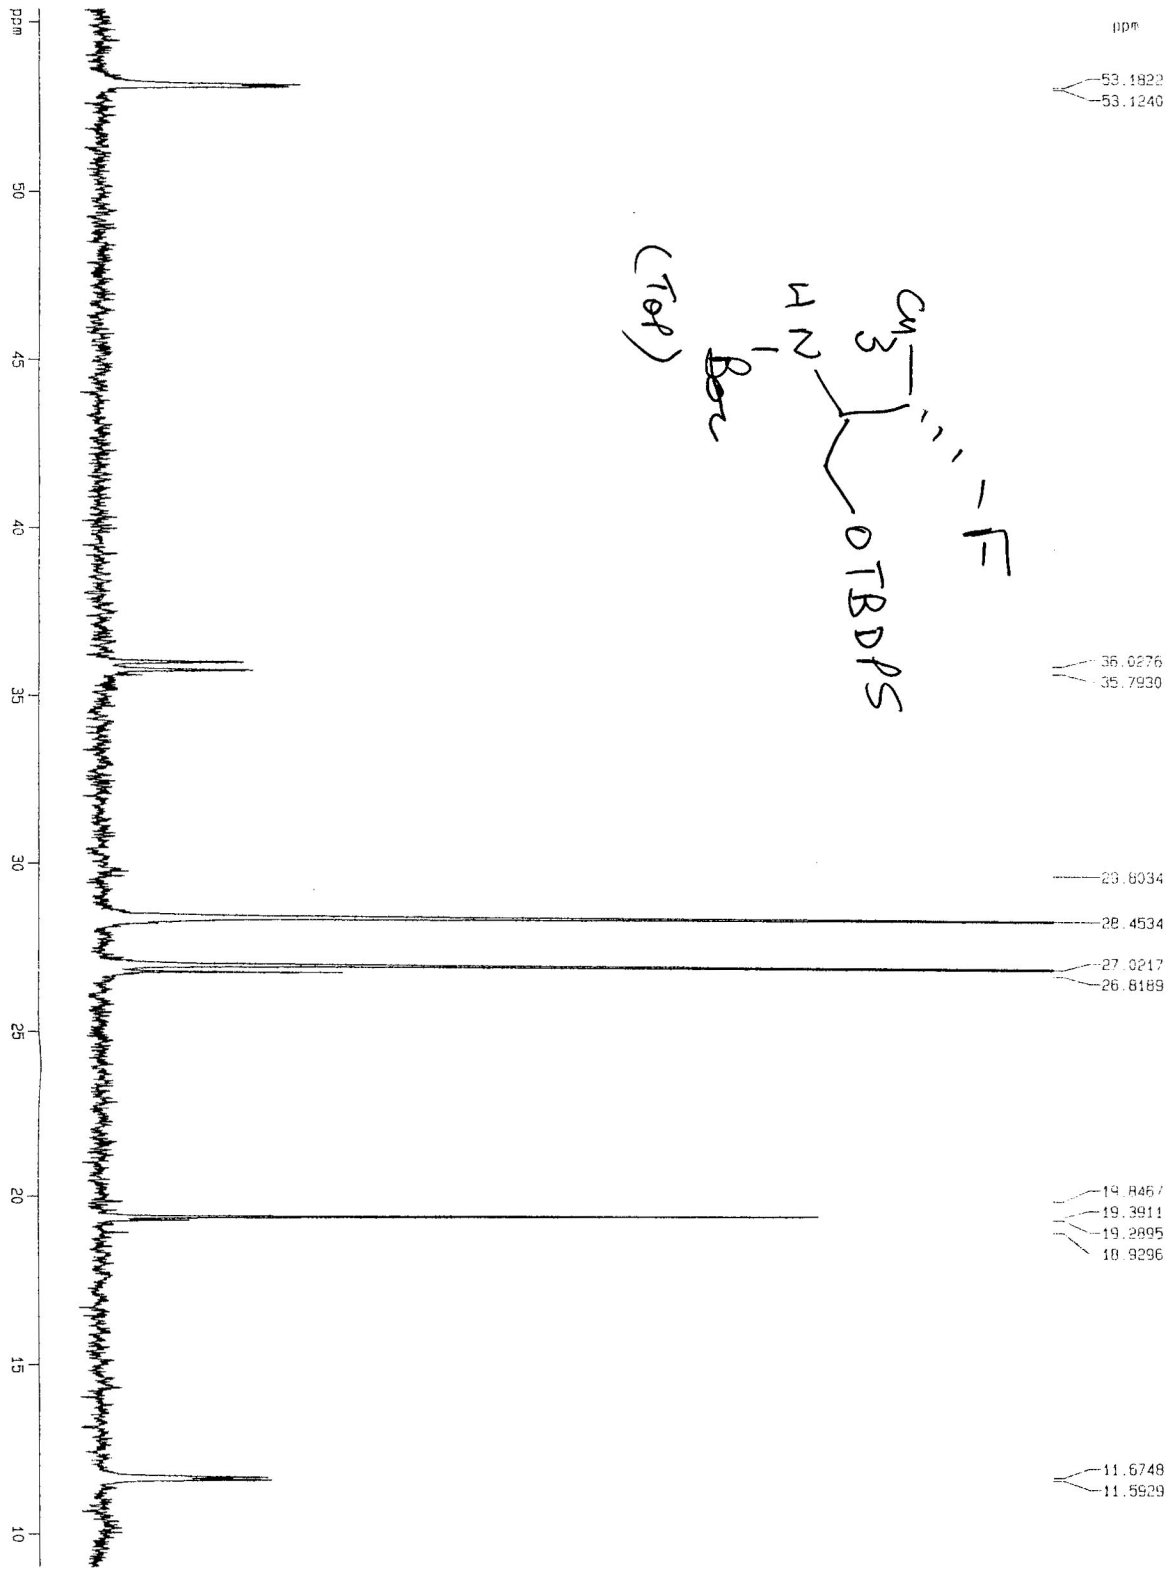

Current Data Parameters  
 NAME jetbart  
 EXPNO 12  
 PROCNO 1

F2 - Acquisition Parameters  
 Date\_ 980509  
 Time 9.53

INSTRUM dpx300  
 PROBHD 5 mm Dual 13  
 PULPROG zgpg30  
 TD 65536  
 SOLVENT CDCl3  
 NS 256  
 DS 2

SMH 23809.523 Hz  
 FIDRES 0.363304 Hz  
 AQ 1.3763061 sec  
 RG 574.7  
 DE 21.000 usec  
 TE 300.0 K

D12 0.00002000 sec  
 PL13 18.00 dB  
 D1 3.00000000 sec  
 waitz16

PCPDPRG2 100.00 usec  
 PCPD2 300.1312005 MHz  
 SF02 130  
 NUC1 13C  
 PL1 -3.00 dB  
 D11 0.03000000 sec

F2 - Processing parameters  
 SI 32768  
 SF 75.4677333 MHz  
 WDM EM  
 SSB 0  
 LB 1.00 Hz  
 GB 0  
 PC 1.40

1D NMR plot parameters  
 CX 30.00 cm  
 F1P 55.397 ppm  
 F1 4180.71 Hz  
 F2P 9.040 ppm  
 F2 682.21 Hz  
 PPMCK 1.54525 ppm/cm  
 HZCM 116.61681 Hz/cm

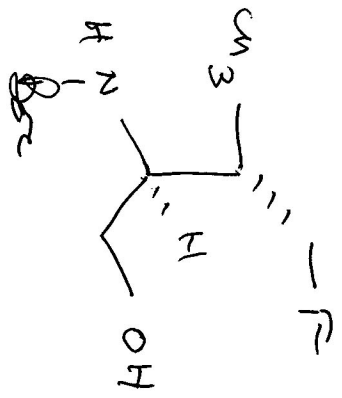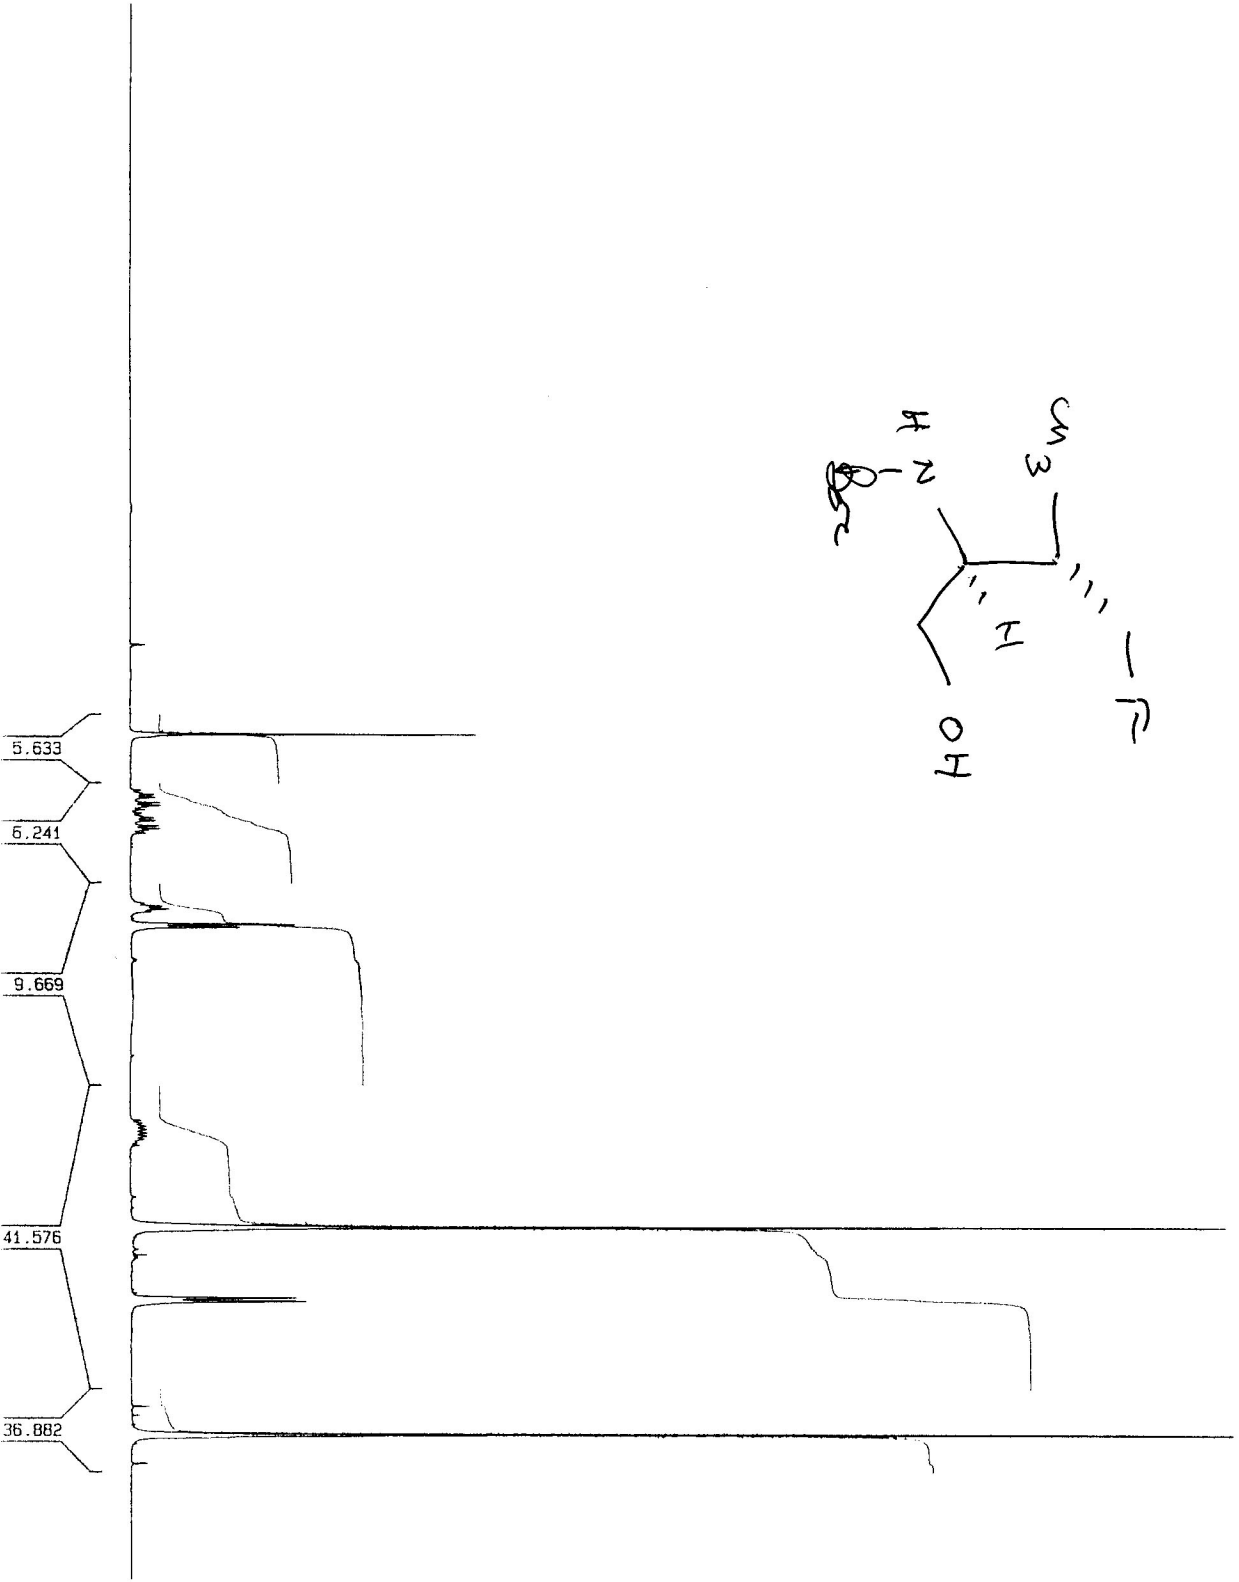

Current Data Parameters  
 NAME jefoh2  
 EXPNO 11  
 PROCNO 1

F2 - Acquisition Parameters

Date\_ 980526  
 Time 18.45  
 INSTRUM dpx300  
 PROBHD 5 mm Dual 13  
 PULPROG zg30  
 TD 32768  
 SOLVENT MeOH  
 NS 16  
 DS 2  
 SWH 6172.839 Hz  
 FIDRES 0.188380 Hz  
 AQ 2.8542580 sec  
 RG 35.9  
 DW 81.000 usec  
 DE 5.50 usec  
 TE 300.0 K  
 D1 1.00000000 sec  
 P1 10.50 usec  
 DE 5.50 usec  
 SFO1 300.1318534 MHz  
 NUC1 1H  
 PL1 -6.00 dB

F2 - Processing parameters

SI 16384  
 SF 300.1300063 MHz  
 MDW EM  
 SSB 0  
 LB 0.30 Hz  
 GB 0  
 PC 1.00

1D NMR plot parameters

CX 30.00 cm  
 F1P 11.000 ppm  
 F1 3301.43 Hz  
 F2P -1.000 ppm  
 F2 -300.13 Hz  
 PPMCM 0.40000 ppm/cm  
 HZCM 120.05200 Hz/cm

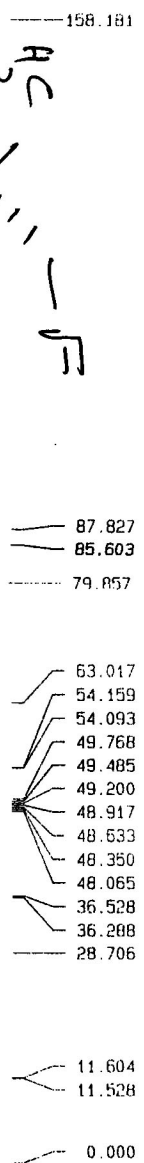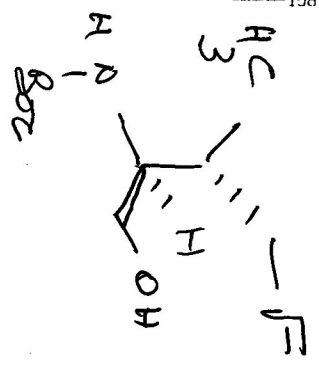

Current Data Parameters  
 NAME jefch2  
 EXPNO 12  
 PROCNO 1

F2 - Acquisition Parameters

Date\_ 980526  
 Time 19.04  
 INSTRUM dpx300  
 PROBNM 5 mm Dual 13  
 PULPROG zgpg30  
 TD 65536  
 SOLVENT MeOH  
 NS 256  
 DS 2  
 SMH 23809.523 Hz  
 FIDRES 0.363304 Hz  
 AQ 1.3763061 sec  
 RG 3649.1  
 DM 21.000 usec  
 DE 5.50 usec  
 TE 300.0 K  
 D12 0.00002000 sec  
 PL13 18.00 dB  
 D1 3.00000000 sec  
 CPDPRG2 waitz16  
 PCPD2 100.00 usec  
 SF02 300.1312005 MHz  
 NUC2 1H  
 PL2 -6.00 dB  
 PL12 16.00 dB  
 P1 6.00 usec  
 DE 5.50 usec  
 SF01 75.4772501 MHz  
 NUC1 13C  
 PL1 -3.00 dB  
 D11 0.030000000 sec

F2 - Processing parameters

SI 32768  
 SF 75.4676545 MHz  
 MDW EM  
 SSB 0  
 LB 1.00 Hz  
 GB 0  
 PC 1.40

1D NMR plot parameters

CX 30.00 cm  
 F1P 240.000 ppm  
 F1 18112.23 Hz  
 F2P 0.000 ppm  
 F2 0.00 Hz  
 PPMCM 8.00000 ppm/cm  
 HZCM 603.74115 Hz/cm

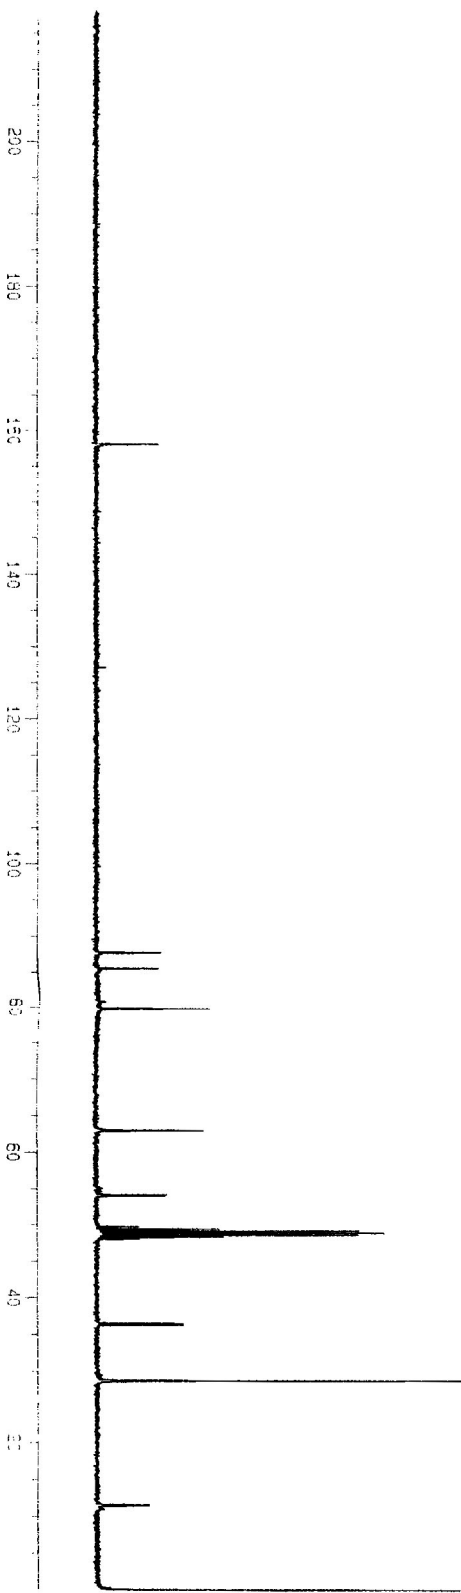

Current Data Parameters  
 NAME jvalif  
 EXPNO 11  
 PROCNO 1

F2 - Acquisition Parameters  
 Date\_ 980924  
 Time 22.14

INSTRUM dpx300  
 PROCBD 5 mm Dual 13  
 PULPROG zg30  
 TD 32768  
 SOLVENT MeOH  
 NS 16  
 DS 2

SWH 6172.839 Hz  
 FIDRES 0.188380 Hz  
 AQ 2.6542580 sec  
 RG 181

DE 81.000 usec  
 TE 300.0 K  
 D1 1.00000000 sec  
 P1 10.50 usec  
 DE 5.50 usec  
 SF01 300.1318534 MHz  
 NUC1 1H  
 PL1 -6.00 dB

F2 - Processing parameters

SI 15384  
 SF 300.1300058 MHz  
 MDW EM  
 SSB 0  
 LB 0.30 Hz  
 GB 0  
 PC 1.00

1D NMR plot parameters

CX 30.00 cm  
 F1P 11.000 ppm  
 F1 3301.43 Hz  
 F2P -1.000 ppm  
 F2 -300.13 Hz  
 PPMCM 0.40000 ppm/cm  
 HZCM 120.05200 Hz/cm

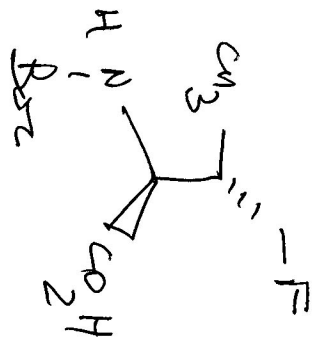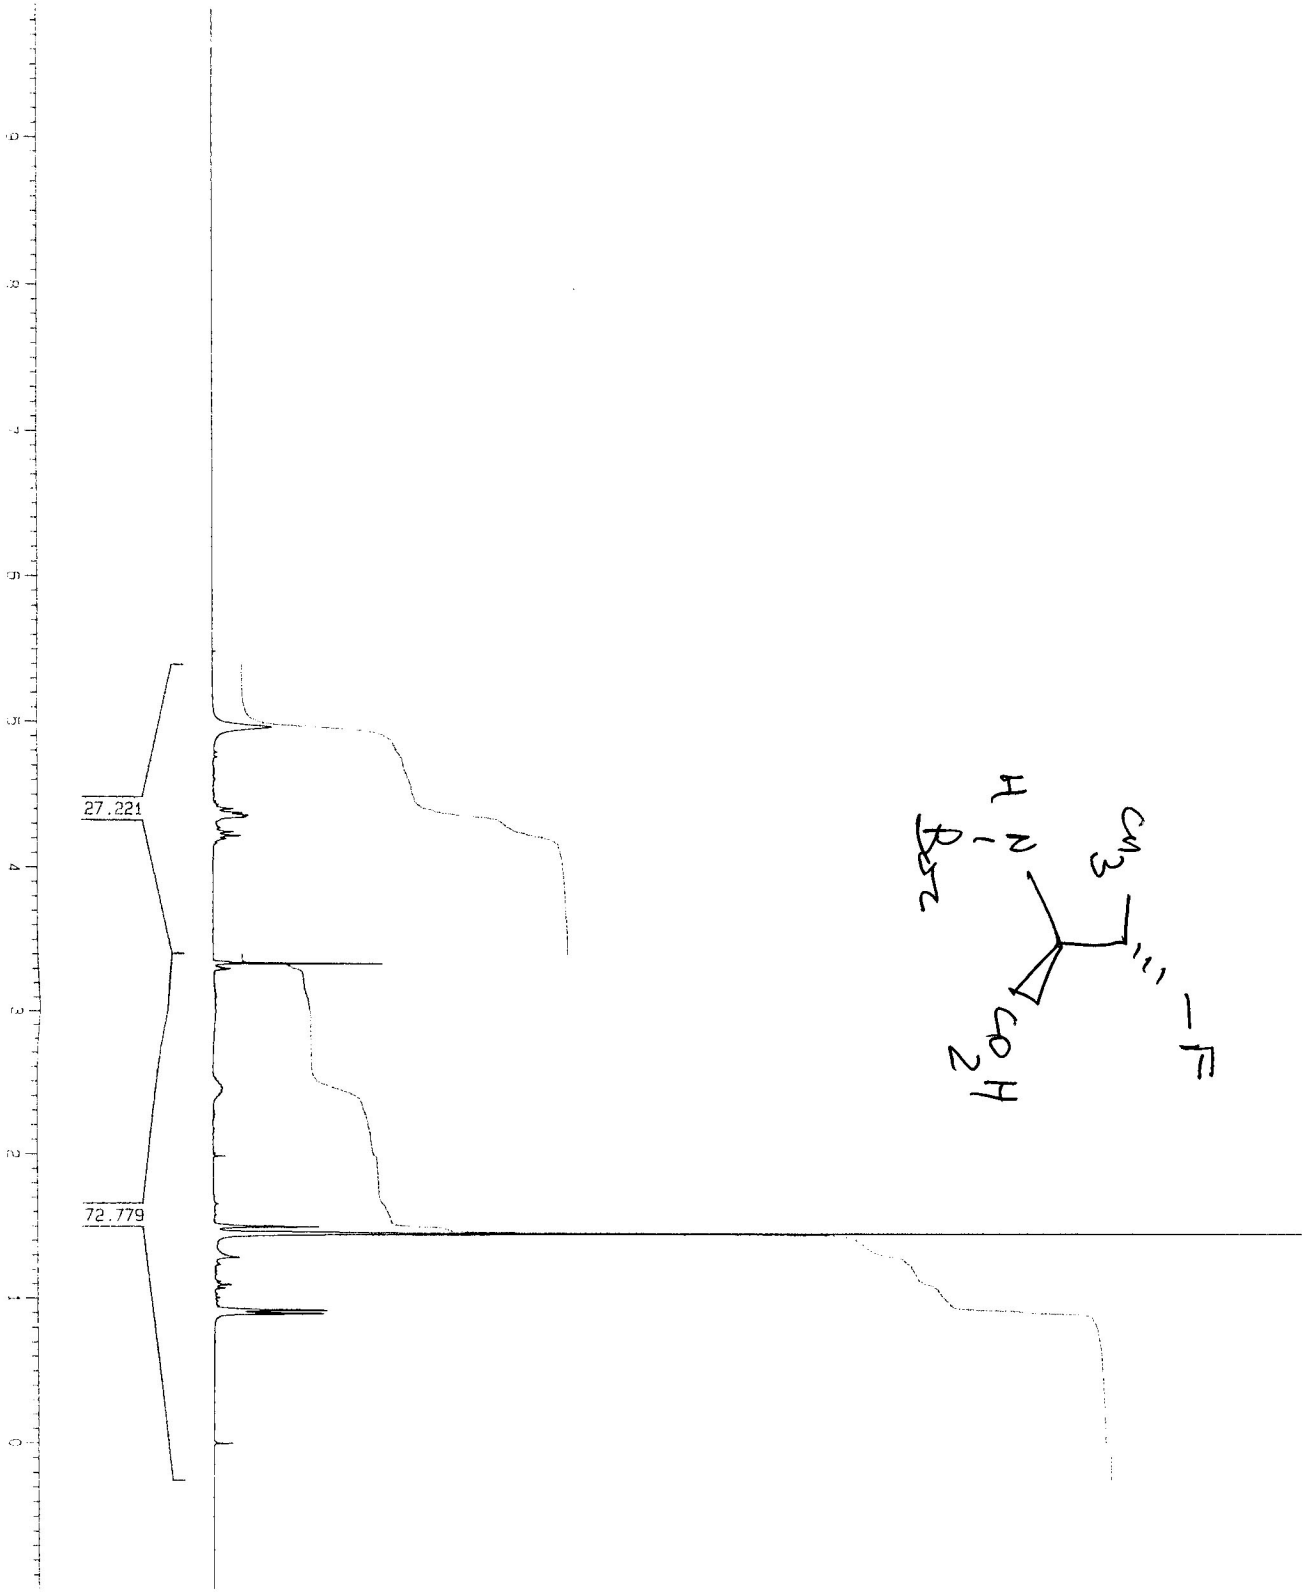

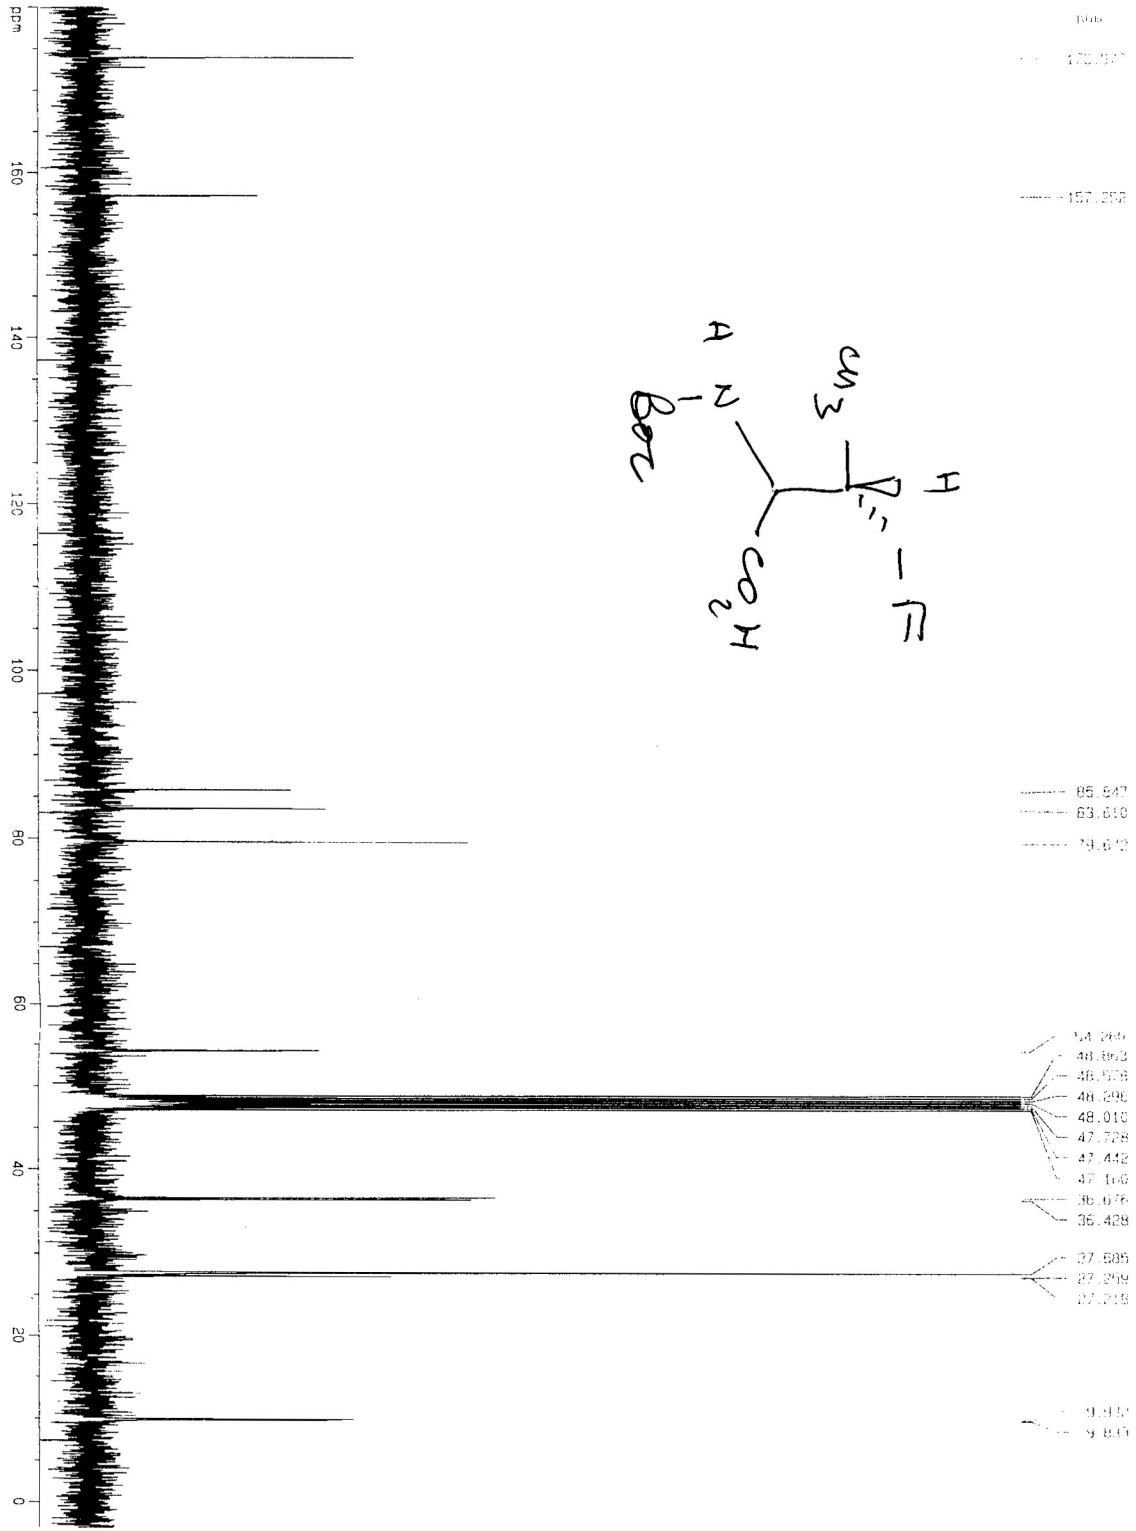

Current Data Parameters  
 NAME JevallF  
 EXPNO 12  
 PROCNO 1

F2 - Acquisition Parameters

Date\_ 980924  
 Time 22.34  
 INSTRUM dx300  
 PROBHD 5 mm Dual 13  
 PULPROG zgpg30  
 TD 65536  
 SOLVENT MeOH  
 NS 286  
 DS 2  
 SWH 23809.523 Hz  
 FIDRES 0.365304 Hz  
 AQ 1.3763061 sec  
 RG 1149.4  
 DM 21.000 usec  
 DE 5.50 usec  
 TE 300.0 K  
 D12 0.00002000 sec  
 PL13 18.00 dB  
 D1 3.00000000 sec  
 CPDPRG2 waltz16  
 PCPD2 100.00 usec  
 SF02 300.1312005 MHz  
 NUC2 1H  
 PL2 -6.00 dB  
 PL12 16.00 dB  
 P1 6.00 usec  
 DE 5.50 usec  
 SF01 75.4772501 MHz  
 NUC1 13C  
 PL1 -3.00 dB  
 D11 0.03000000 sec

F2 - Processing parameters

SF 32768  
 SF 75.4677190 MHz  
 WDM EM  
 SSB 0  
 LB 1.00 Hz  
 GB 0  
 PC 1.40

1D NMR plot parameters

CX 30.00 cm  
 F1P 190.104 DDM  
 F1 13592.05 Hz  
 F2P -3.056 ppm  
 F2 -230.50 Hz  
 PPKM 6.10532 ppm/cm  
 HZCM 460.75485 Hz/cm



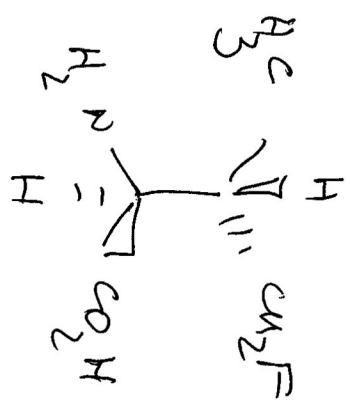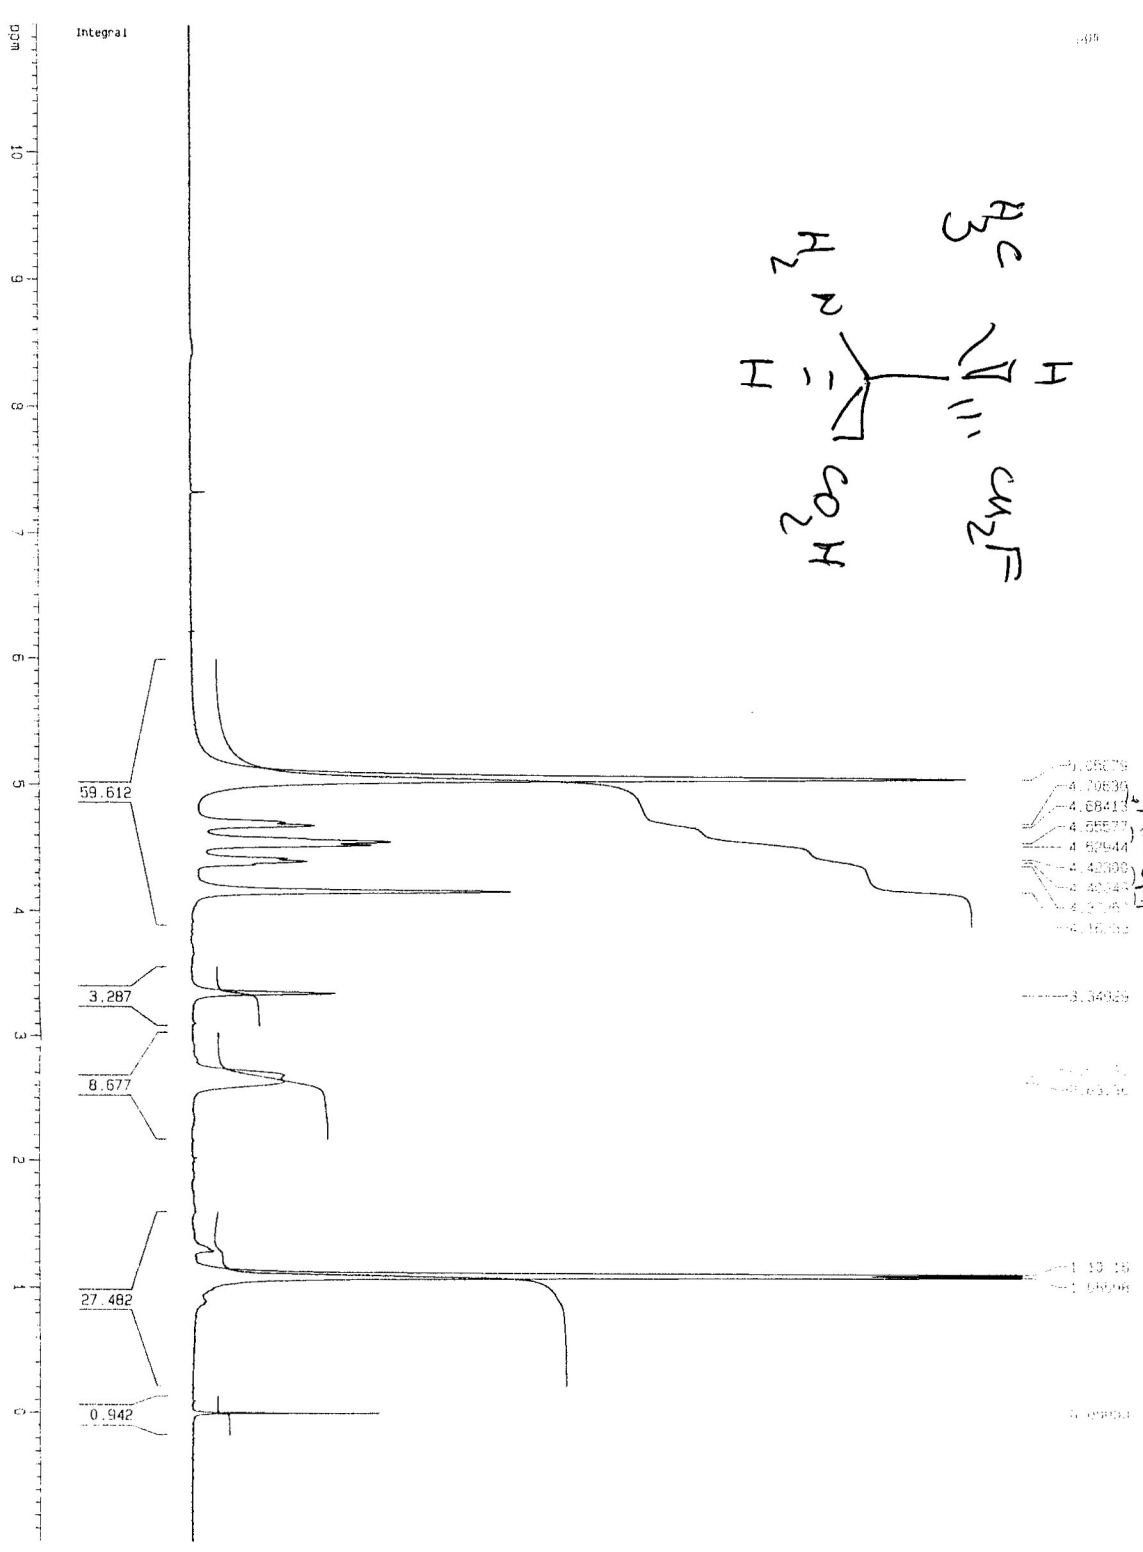

4.08678  
 4.10639  
 4.68413  
 4.68677  
 4.82444  
 4.42000  
 4.42248  
 4.42496  
 4.12152

Current Data Parameters  
 NAME Jvalife  
 EXPNO 10  
 PROCNO 1

F2 - Acquisition Parameters  
 Date\_ 981015  
 Time 15.05  
 INSTRUM dpx300  
 PROBHD 5 mm Dual 13  
 PULPROG zg30  
 TD 32768  
 SOLVENT MeOH  
 NS 16  
 DS 2  
 SMH 6172.839 Hz  
 FIDRES 0.189380 Hz  
 AQ 2.6542580 sec  
 RG 256  
 DW 81.000 usec  
 DE 5.50 usec  
 TE 300.0 K  
 O1 1.00000000 sec  
 P1 10.50 usec  
 DE 5.50 usec  
 SFO1 300.1318534 MHz  
 NUC1 1H  
 PL1 -6.00 dB

F2 - Processing Parameters  
 SI 16384  
 SF 300.1299885 MHz  
 WDW EM  
 SSB 0  
 LB 0.30 Hz  
 GB 0  
 PC 1.00

1D NMR plot parameters  
 CX 30.00 cm  
 F1P 11.000 DPM  
 F1 3301.43 Hz  
 F2P -1.000 DPM  
 F2 -300.13 Hz  
 PPMCK 0.40000 DPM/cm  
 HZCM 120.05199 Hz/cm

vai1f-JD

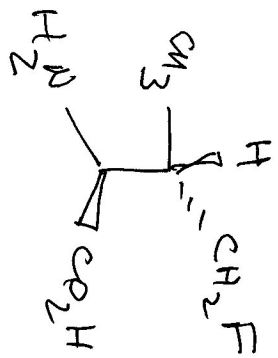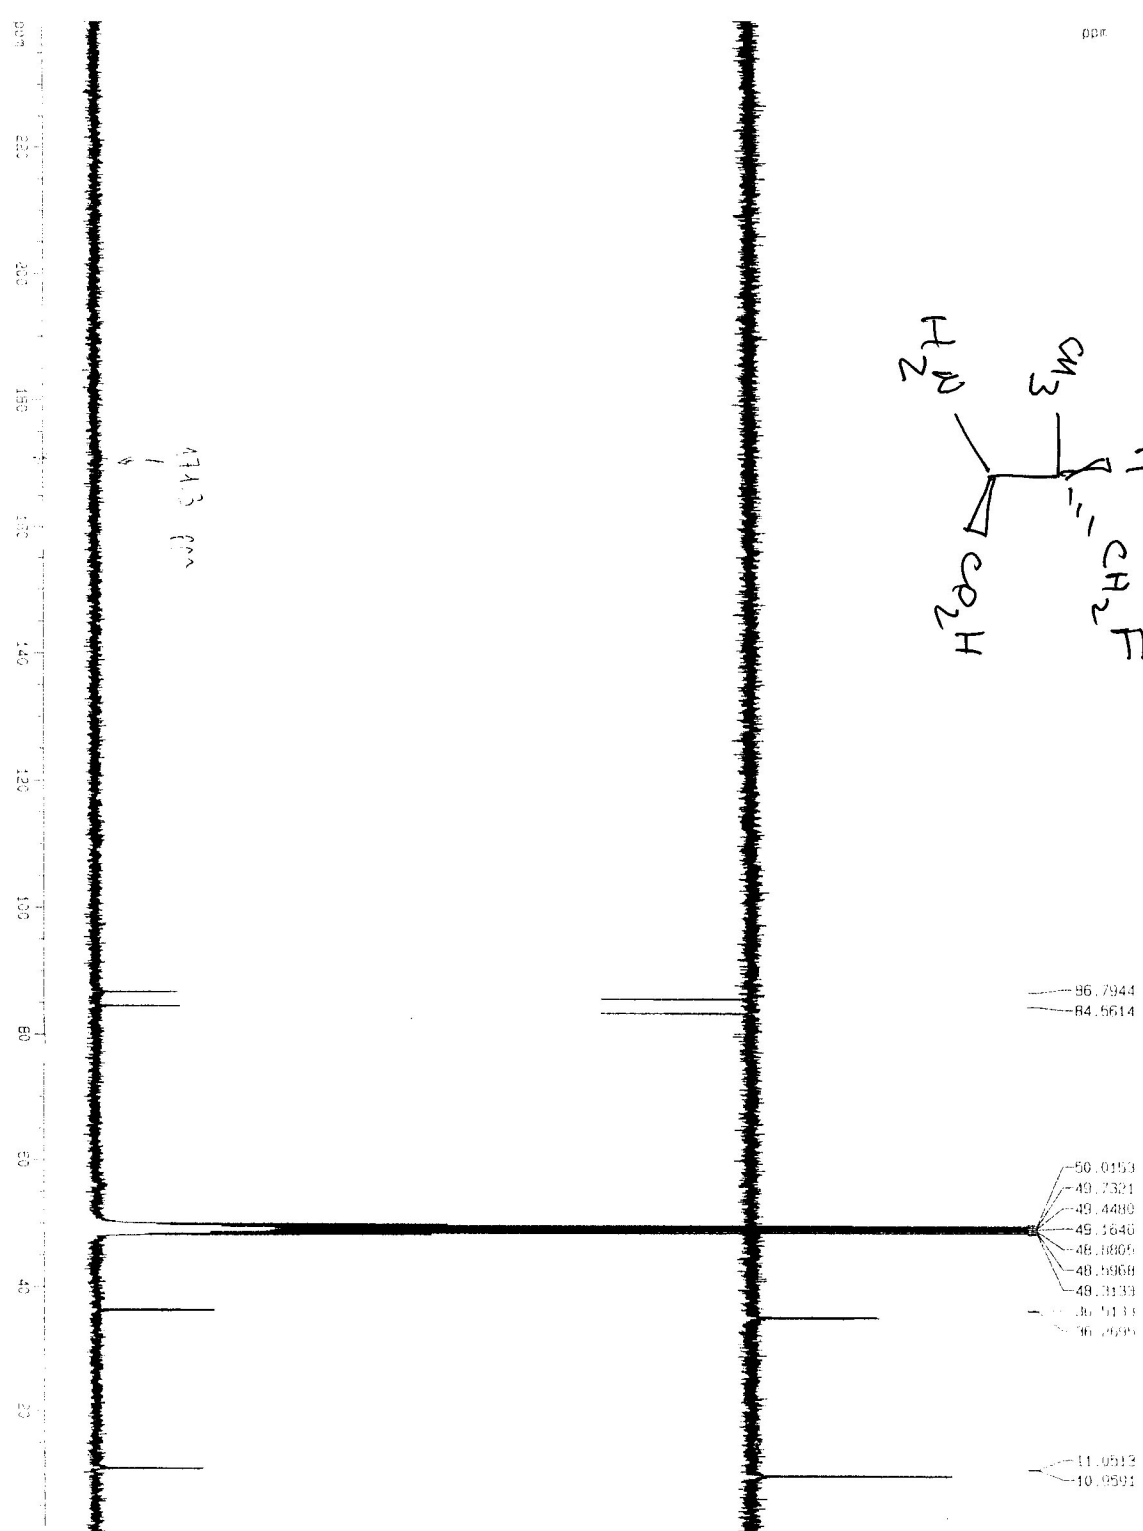

2.233

2.438

2.132

Current Data Parameters  
 NAME vai1f  
 EXPNO 11  
 PROCNO 1

F2 - Acquisition Parameters  
 Date\_ 981013  
 Time 5.40

INSTRUM dpx300  
 PROBHID 5 mm Dual 13  
 PULPROG zgpg30  
 TD 65536  
 SOLVENT MeOH  
 NS 2048  
 DS 2

SMH 23809.523 Hz  
 FIDRES 0.363304 Hz  
 AQ 1.3763061 sec  
 SFO2 4095

DE 21.000 usec  
 TE 300.0 K

D12 0.00002000 sec  
 PL13 18.00 dB

D1 3.00000000 sec  
 CPDPRG2 waitz16

PCPD2 100.00 usec  
 SFO2 300.1312005 MHz

NUC2 1H  
 PL2 -6.00 dB

PL12 16.00 dB  
 P1 6.00 usec

DE 5.50 usec  
 SFO1 75.4772501 MHz

NUC1 13C  
 PL1 -3.00 dB

D11 0.03000000 sec

F2 - Processing Parameters  
 SI 32768

SF 75.4676374 MHz  
 MDH EM

SSB 0  
 LB 1.00 Hz

GB 0  
 PC 1.40

1D NMR plot parameters  
 CX 30.00 cm

F1P 240.000 ppm  
 F1 18112.23 Hz

F2P 0.000 ppm  
 F2 0.00 Hz

PPMCM 9.00000 ppm/cm  
 HZCM 603.74103 Hz/cm
